# Supplementary material for: Insight into the direct conversion of methane to methanol on modified ZIF-204 from the perspective of DFT-based calculations
Source: Royal Society of Chemistry journal article supplement (doi:10.1039/d3ra02650g), 2023-01-01
Supplement: d3ra02650g1.pdf [file d3ra02650g1.pdf]

## Electronic Supplementary Information

# Insight into the direct conversion of methane to methanol on modified ZIF-204 from the perspective of DFT-based calculations

Thong Nguyen-Minh Le,<sup>a,b,\*</sup> Thu Nguyen-Bao Le,<sup>b,c</sup> Phat Tan Nguyen,<sup>b,d</sup> Trang Thuy Nguyen,<sup>e</sup> Quang Ngoc Tran,<sup>a,b</sup> Toan The Nguyen,<sup>e</sup> Yoshiyuki Kawazoe,<sup>f,g,h</sup> Thang Bach Phan,<sup>a,b</sup> Duc Manh Nguyen<sup>i</sup>

<sup>a</sup>Center for Innovative Materials and Architectures, Ho Chi Minh City 700000, Vietnam

<sup>b</sup>Vietnam National University Ho Chi Minh City, Ho Chi Minh City 700000, Viet Nam

<sup>c</sup>Department of Mathematics and Physics, University of Information Technology, Ho Chi Minh City 700000, Viet Nam

<sup>d</sup>Department of Theoretical Physics, University of Science, Ho Chi Minh City 700000, Vietnam

<sup>e</sup>Key Laboratory for Multiscale Simulation of Complex Systems, University of Science, Vietnam National University – Hanoi, Hanoi 100000, Vietnam

<sup>f</sup>New Industry Creation Hatchery Center, Tohoku University, Sendai, 980-8579, Japan

<sup>g</sup>Department of Physics and Nanotechnology, SRM Institute of Science and Technology, Kattankulathur 603203, Tamil Nadu, India

<sup>h</sup>School of Physics, Institute of Science, Suranaree University of Technology, 111 University Avenue, Nakhon Ratchasima 30000, Thailand

<sup>i</sup>CCFE, United Kingdom Atomic Energy Authority, Abingdon, OX14 3DB, UK

\*Corresponding author's email: [lnmthong@inomar.edu.vn](mailto:lnmthong@inomar.edu.vn)

### Table of content

#### S1. Linear response method

#### S2. Lattice parameters

#### S3. Absolute energies and atomic positions

#### References

## S1. Linear response method

Linear response method is used to determine the Hubbard U correction for Cu transition metal in ZIF-204.<sup>1</sup> U is calculated through the following equations.

$$\chi_{IJ}^0 = \frac{\partial N_I^{NSCF}}{\partial V_J} \quad (1)$$

$$\chi_{IJ} = \frac{\partial N_I^{SCF}}{\partial V_J} \quad (2)$$

$$U = \chi_{IJ}^{-1} - \chi_{IJ}^0{}^{-1} = \left( \frac{\partial N_I^{SCF}}{\partial V_J} \right)^{-1} - \left( \frac{\partial N_I^{NSCF}}{\partial V_J} \right)^{-1} \quad (3)$$

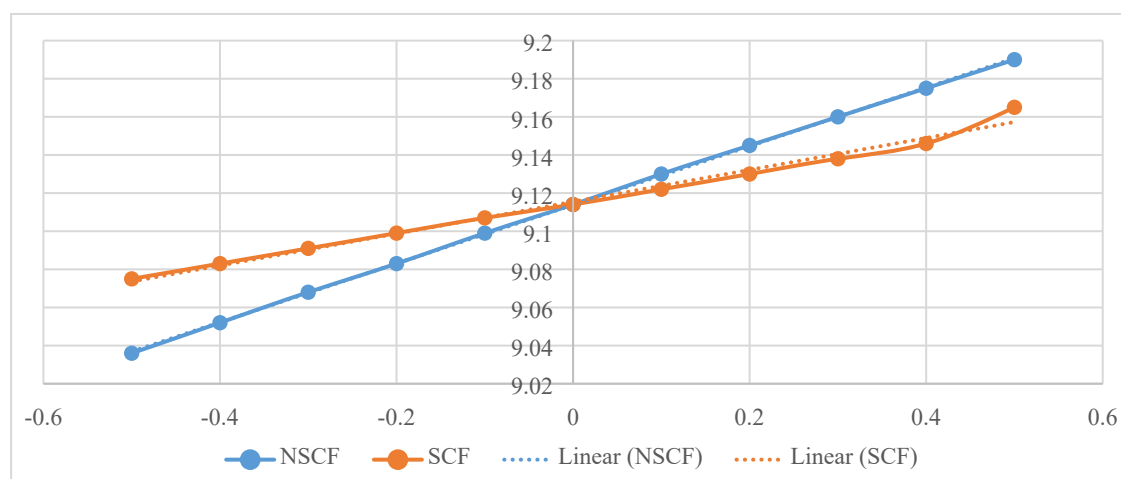

Figure S1. Plot of variation of the numbers of d electrons against potential. The differential of numbers of d electrons vs potential is determined by the tangent of the linear-fitting lines.

Table S1. Variation of the numbers of d electrons against potential, and calculated U derived from linear-fitting values.

| $V_J$ (eV) | $N_I^{NSCF}$ | $N_I^{SCF}$ |
|------------|--------------|-------------|
| -0.5       | 9.036        | 9.075       |
| -0.4       | 9.052        | 9.083       |
| -0.3       | 9.068        | 9.091       |
| -0.2       | 9.083        | 9.099       |
| -0.1       | 9.099        | 9.107       |
| 0.0        | 9.114        | 9.114       |
| 0.1        | 9.13         | 9.122       |
| 0.2        | 9.145        | 9.13        |

|                                               |       |       |
|-----------------------------------------------|-------|-------|
| 0.3                                           | 9.16  | 9.138 |
| 0.4                                           | 9.175 | 9.146 |
| 0.5                                           | 9.19  | 9.165 |
| $\chi_{IJ}$                                   | 0.154 | 0.084 |
| $U = \chi_{IJ}^{-1} - \chi_{IJ}^0^{-1} = 5.5$ |       |       |

## S2. Lattice parameters

Table S2. Lattice parameters of pristine ZI calculated by various functionals. Bold numbers with minus (-)/plus (+) signs indicate decrease/increase in percentage (%) between calculated and experimental values.

| Functional        | a (Å)                 | b (Å)                 | c (Å)                 | $\beta$ (°)           | V (Å <sup>3</sup> )   |
|-------------------|-----------------------|-----------------------|-----------------------|-----------------------|-----------------------|
| LDA               | 11.67<br><b>-2.26</b> | 12.44<br><b>-6.54</b> | 17.10<br><b>-3.77</b> | 94.31<br><b>-4.11</b> | 2476<br><b>-11.38</b> |
| PBE               | 12.19<br><b>+2.01</b> | 13.09<br><b>-1.58</b> | 17.55<br><b>-1.24</b> | 95.98<br><b>-2.41</b> | 2785<br><b>-0.36</b>  |
| revPBE            | 11.97<br><b>+0.17</b> | 12.71<br><b>-4.44</b> | 17.36<br><b>-2.36</b> | 93.91<br><b>-4.51</b> | 2638<br><b>-5.62</b>  |
| RPBE              | 11.82<br><b>-1.09</b> | 12.72<br><b>-4.36</b> | 17.30<br><b>-2.36</b> | 93.67<br><b>-4.76</b> | 2597<br><b>-7.08</b>  |
| PBE-D3            | 11.96<br><b>+0.17</b> | 12.77<br><b>-3.98</b> | 17.31<br><b>-2.64</b> | 94.30<br><b>-4.12</b> | 2636<br><b>-5.65</b>  |
| PBE-D3-U          | 11.94<br><b>+0.17</b> | 12.76<br><b>-4.06</b> | 17.29<br><b>-2.70</b> | 94.40<br><b>-4.06</b> | 2626<br><b>-6.01</b>  |
| Exp. <sup>2</sup> | 11.95                 | 13.30                 | 17.78                 | 98.35                 | 2795                  |

Lattice parameters are bench-marked on various functionals, for both local and gradient density approximations, i.e., LDA, PBE, PBE-D3, and PBE-D3-U. We found that all applied functionals underestimate lattice parameters and unit-cell volumes. Optimized values from LDA manifest the biggest deviations, smaller than the experimental values, from 2% to 6% for lattice parameters and over 10% for the volume. For PBE functional, the lattice constants a, b, and c are 12.19, 13.09, and 17.55 Å compared to 11.95, 13.30, and 17.78 Å for PBE and experimental values, respectively. This leads to a negligible discrepancy, under 1%, in the volume. Other GGA functionals corrected to PBE like revPBE and RPBE result in differences in unit cell volumes of about 5 to 7 % compared to the experimental value. Including van der Waals corrections, PBE-D3 and PBE-D3-U show a difference less than 4% for lattice constants and 6% for the unit-cell volume. In this work, PBE-D3-U will be employed in all calculations to take into account van der Waals interaction for inert gas methane and the strong-correlated effect for transition metal copper presented in ZI.

## S3. Absolute energies and atomic positions

### S3.1. CH<sub>4</sub>

Energy (eV): -24.07

Simulation cell vectors (Å):

|     |              |              |              |
|-----|--------------|--------------|--------------|
| a = | 20.000000000 | 0.000000000  | 0.000000000  |
| b = | 0.000000000  | 20.000000000 | 0.000000000  |
| c = | 0.000000000  | 0.000000000  | 20.000000000 |

Fractional coordinates:

| No. | Element | X           | Y           | Z           |
|-----|---------|-------------|-------------|-------------|
| 1   | C       | 0.387996282 | 0.499799460 | 0.456786962 |
| 2   | H       | 0.442797139 | 0.499799695 | 0.456798999 |
| 3   | H       | 0.369722423 | 0.465693056 | 0.417982917 |
| 4   | H       | 0.369719238 | 0.550456461 | 0.446657079 |
| 5   | H       | 0.369714937 | 0.483251400 | 0.504973985 |

### S3.2. ZI

Energy (eV): -1121.31

Simulation cell vectors (Å):

|     |              |              |              |
|-----|--------------|--------------|--------------|
| a = | 11.927633681 | 0.000000000  | 0.424723268  |
| b = | 0.000000000  | 12.763023019 | 0.000000000  |
| c = | -1.937808522 | 0.000000000  | 17.183883365 |

Fractional coordinates:

| No. | Element | X           | Y           | Z           |
|-----|---------|-------------|-------------|-------------|
| 1   | Zn      | 0.701634583 | 0.532190800 | 0.194537513 |
| 2   | Zn      | 0.298365475 | 0.467809164 | 0.805462478 |
| 3   | Zn      | 0.798365494 | 0.032190818 | 0.305462476 |
| 4   | Zn      | 0.201634516 | 0.967809200 | 0.694537529 |
| 5   | Cu      | 0.034309635 | 0.665177783 | 0.446877395 |
| 6   | Cu      | 0.965690277 | 0.334822253 | 0.553122664 |
| 7   | Cu      | 0.465690388 | 0.165177729 | 0.053122621 |
| 8   | Cu      | 0.534309656 | 0.834822217 | 0.946877398 |
| 9   | Cu      | 0.500000000 | 0.500000000 | 0.500000002 |
| 10  | Cu      | 0.000000000 | 0.000000000 | 0.000000000 |
| 11  | N       | 0.675074332 | 0.414315565 | 0.119996465 |
| 12  | N       | 0.324925672 | 0.585684435 | 0.880003553 |
| 13  | N       | 0.824925705 | 0.914315601 | 0.380003524 |
| 14  | N       | 0.175074320 | 0.085684444 | 0.619996454 |
| 15  | N       | 0.576717199 | 0.280690695 | 0.065392304 |
| 16  | N       | 0.423282814 | 0.719309287 | 0.934607667 |
| 17  | N       | 0.923282880 | 0.780690713 | 0.434607691 |
| 18  | N       | 0.076717190 | 0.219309305 | 0.565392287 |

|    |   |             |             |             |
|----|---|-------------|-------------|-------------|
| 19 | N | 0.586321857 | 0.521892650 | 0.272306600 |
| 20 | N | 0.413678192 | 0.478107350 | 0.727693351 |
| 21 | N | 0.913678177 | 0.021892668 | 0.227693375 |
| 22 | N | 0.086321829 | 0.978107314 | 0.772306657 |
| 23 | N | 0.509926333 | 0.513994618 | 0.386411451 |
| 24 | N | 0.490073673 | 0.486005382 | 0.613588581 |
| 25 | N | 0.990073669 | 0.013994637 | 0.113588572 |
| 26 | N | 0.009926288 | 0.986005382 | 0.886411426 |
| 27 | N | 0.850651816 | 0.547877380 | 0.253264639 |
| 28 | N | 0.149348156 | 0.452122620 | 0.746735421 |
| 29 | N | 0.649348144 | 0.047877362 | 0.246735364 |
| 30 | N | 0.350651825 | 0.952122656 | 0.753264587 |
| 31 | N | 0.976081408 | 0.603446341 | 0.347154072 |
| 32 | N | 0.023918632 | 0.396553659 | 0.652845932 |
| 33 | N | 0.523918635 | 0.103446314 | 0.152845944 |
| 34 | N | 0.476081369 | 0.896553659 | 0.847154075 |
| 35 | N | 0.159593371 | 0.563244315 | 0.456314740 |
| 36 | N | 0.840406600 | 0.436755685 | 0.543685265 |
| 37 | N | 0.340406623 | 0.063244301 | 0.043685279 |
| 38 | N | 0.659593350 | 0.936755685 | 0.956314688 |
| 39 | N | 0.334521564 | 0.504245051 | 0.483024879 |
| 40 | N | 0.665478397 | 0.495754985 | 0.516975126 |
| 41 | N | 0.165478434 | 0.004245034 | 0.016975112 |
| 42 | N | 0.834521604 | 0.995754985 | 0.983024881 |
| 43 | N | 0.089054769 | 0.721992852 | 0.548967943 |
| 44 | N | 0.910945291 | 0.278007183 | 0.451032062 |
| 45 | N | 0.410945200 | 0.221992817 | 0.951032010 |
| 46 | N | 0.589054751 | 0.778007148 | 0.048967950 |
| 47 | N | 0.164022799 | 0.834454583 | 0.637441875 |
| 48 | N | 0.835977243 | 0.165545417 | 0.362558184 |
| 49 | N | 0.335977212 | 0.334454583 | 0.862558133 |
| 50 | N | 0.664022797 | 0.665545417 | 0.137441818 |
| 51 | C | 0.598854183 | 0.338489490 | 0.129874942 |
| 52 | C | 0.401145795 | 0.661510474 | 0.870125049 |
| 53 | C | 0.901145854 | 0.838489526 | 0.370125046 |
| 54 | C | 0.098854202 | 0.161510501 | 0.629874958 |
| 55 | C | 0.703528269 | 0.404091633 | 0.044320175 |
| 56 | C | 0.296471738 | 0.595908403 | 0.955679857 |
| 57 | C | 0.796471772 | 0.904091633 | 0.455679828 |
| 58 | C | 0.203528255 | 0.095908376 | 0.544320204 |
| 59 | C | 0.642505747 | 0.322115721 | 0.010644066 |
| 60 | C | 0.357494315 | 0.677884351 | 0.989355946 |
| 61 | C | 0.857494255 | 0.822115649 | 0.489355944 |
| 62 | C | 0.142505716 | 0.177884279 | 0.510644061 |
| 63 | C | 0.602164686 | 0.496442327 | 0.347846006 |
| 64 | C | 0.397835326 | 0.503557637 | 0.652154053 |
| 65 | C | 0.897835357 | 0.996442350 | 0.152154010 |
| 66 | C | 0.102164675 | 0.003557709 | 0.847845954 |

|     |   |             |             |             |
|-----|---|-------------|-------------|-------------|
| 67  | C | 0.477078584 | 0.558023928 | 0.261572003 |
| 68  | C | 0.522921484 | 0.441976072 | 0.738427948 |
| 69  | C | 0.022921435 | 0.058023914 | 0.238427973 |
| 70  | C | 0.977078557 | 0.941976108 | 0.761572059 |
| 71  | C | 0.429823861 | 0.552677047 | 0.331569225 |
| 72  | C | 0.570176168 | 0.447322917 | 0.668430725 |
| 73  | C | 0.070176154 | 0.052677085 | 0.168430750 |
| 74  | C | 0.929823873 | 0.947322953 | 0.831569282 |
| 75  | C | 0.866521550 | 0.597496030 | 0.322028269 |
| 76  | C | 0.133478395 | 0.402503970 | 0.677971709 |
| 77  | C | 0.633478410 | 0.097496030 | 0.177971734 |
| 78  | C | 0.366521636 | 0.902503970 | 0.822028298 |
| 79  | C | 0.956622656 | 0.521344688 | 0.232833567 |
| 80  | C | 0.043377365 | 0.478655348 | 0.767166438 |
| 81  | C | 0.543377345 | 0.021344671 | 0.267166436 |
| 82  | C | 0.456622656 | 0.978655276 | 0.732833569 |
| 83  | C | 0.033892304 | 0.555335425 | 0.290677813 |
| 84  | C | 0.966107691 | 0.444664611 | 0.709322165 |
| 85  | C | 0.466107694 | 0.055335393 | 0.209322176 |
| 86  | C | 0.533892270 | 0.944664611 | 0.790677842 |
| 87  | C | 0.266885669 | 0.588612881 | 0.478964528 |
| 88  | C | 0.733114382 | 0.411387083 | 0.521035477 |
| 89  | C | 0.233114338 | 0.088612917 | 0.021035461 |
| 90  | C | 0.766885659 | 0.911387119 | 0.978964530 |
| 91  | C | 0.158847965 | 0.456057291 | 0.445668580 |
| 92  | C | 0.841151966 | 0.543942673 | 0.554331425 |
| 93  | C | 0.341152047 | 0.956057291 | 0.054331430 |
| 94  | C | 0.658847995 | 0.043942709 | 0.945668582 |
| 95  | C | 0.266904464 | 0.419710431 | 0.462389507 |
| 96  | C | 0.733095545 | 0.580289569 | 0.537610444 |
| 97  | C | 0.233095510 | 0.919710467 | 0.037610465 |
| 98  | C | 0.766904508 | 0.080289560 | 0.962389618 |
| 99  | C | 0.115548389 | 0.822724200 | 0.565055140 |
| 100 | C | 0.884451647 | 0.177275817 | 0.434944892 |
| 101 | C | 0.384451594 | 0.322724200 | 0.934944921 |
| 102 | C | 0.615548355 | 0.677275800 | 0.065055118 |
| 103 | C | 0.122296719 | 0.666056025 | 0.615188084 |
| 104 | C | 0.877703238 | 0.333943939 | 0.384811948 |
| 105 | C | 0.377703312 | 0.166056061 | 0.884811923 |
| 106 | C | 0.622296725 | 0.833943975 | 0.115188068 |
| 107 | C | 0.167955772 | 0.735440165 | 0.669829620 |
| 108 | C | 0.832044184 | 0.264559853 | 0.330170412 |
| 109 | C | 0.332044239 | 0.235440129 | 0.830170387 |
| 110 | C | 0.667955776 | 0.764559835 | 0.169829591 |
| 111 | H | 0.559707726 | 0.326194317 | 0.183757311 |
| 112 | H | 0.440292278 | 0.673805683 | 0.816242708 |
| 113 | H | 0.940292312 | 0.826194317 | 0.316242678 |
| 114 | H | 0.059707743 | 0.173805683 | 0.683757300 |

|     |   |             |             |             |
|-----|---|-------------|-------------|-------------|
| 115 | H | 0.764222680 | 0.455579263 | 0.020190325 |
| 116 | H | 0.235777293 | 0.544420701 | 0.979809646 |
| 117 | H | 0.735777285 | 0.955579299 | 0.479809698 |
| 118 | H | 0.264222696 | 0.044420737 | 0.520190307 |
| 119 | H | 0.640109242 | 0.291174667 | 0.952171027 |
| 120 | H | 0.359890790 | 0.708825369 | 0.047828934 |
| 121 | H | 0.859890720 | 0.791174631 | 0.547828980 |
| 122 | H | 0.140109213 | 0.208825333 | 0.452171079 |
| 123 | H | 0.680118633 | 0.464797099 | 0.374320228 |
| 124 | H | 0.319881416 | 0.535202937 | 0.625679723 |
| 125 | H | 0.819881324 | 0.964797079 | 0.125679761 |
| 126 | H | 0.180118606 | 0.035202865 | 0.874320285 |
| 127 | H | 0.442180023 | 0.585823448 | 0.205505844 |
| 128 | H | 0.557820017 | 0.414176517 | 0.794494160 |
| 129 | H | 0.057820007 | 0.085823479 | 0.294494158 |
| 130 | H | 0.942180024 | 0.914176552 | 0.705505847 |
| 131 | H | 0.346225423 | 0.573810292 | 0.346245357 |
| 132 | H | 0.653774584 | 0.426189708 | 0.653754675 |
| 133 | H | 0.153774574 | 0.073810291 | 0.153754673 |
| 134 | H | 0.846225377 | 0.926189708 | 0.846245332 |
| 135 | H | 0.799029123 | 0.628383273 | 0.353926059 |
| 136 | H | 0.200970888 | 0.371616691 | 0.646073946 |
| 137 | H | 0.700970921 | 0.128383300 | 0.146073957 |
| 138 | H | 0.299029103 | 0.871616727 | 0.853926061 |
| 139 | H | 0.969091824 | 0.479886311 | 0.179421698 |
| 140 | H | 0.030908120 | 0.520113689 | 0.820578320 |
| 141 | H | 0.530908140 | 0.979886347 | 0.320578318 |
| 142 | H | 0.469091861 | 0.020113675 | 0.679421687 |
| 143 | H | 0.124540520 | 0.547702786 | 0.296202956 |
| 144 | H | 0.875459556 | 0.452297178 | 0.703797076 |
| 145 | H | 0.375459467 | 0.047702801 | 0.203797033 |
| 146 | H | 0.624540485 | 0.952297250 | 0.796202931 |
| 147 | H | 0.294669726 | 0.667698103 | 0.493242407 |
| 148 | H | 0.705330275 | 0.332301861 | 0.506757598 |
| 149 | H | 0.205330270 | 0.167698121 | 0.006757573 |
| 150 | H | 0.794669698 | 0.832301897 | 0.993242464 |
| 151 | H | 0.083194921 | 0.414208166 | 0.425403603 |
| 152 | H | 0.916805020 | 0.585791869 | 0.574596402 |
| 153 | H | 0.416805098 | 0.914208166 | 0.074596392 |
| 154 | H | 0.583194890 | 0.085791834 | 0.925403552 |
| 155 | H | 0.299793904 | 0.340587747 | 0.461317760 |
| 156 | H | 0.700206057 | 0.659412253 | 0.538682245 |
| 157 | H | 0.200206099 | 0.840587747 | 0.038682251 |
| 158 | H | 0.799793916 | 0.159412244 | 0.961317817 |
| 159 | H | 0.098628477 | 0.887058944 | 0.524782595 |
| 160 | H | 0.901371524 | 0.112941047 | 0.475217410 |
| 161 | H | 0.401371512 | 0.387058980 | 0.975217358 |
| 162 | H | 0.598628444 | 0.612941056 | 0.024782623 |

|     |   |             |             |             |
|-----|---|-------------|-------------|-------------|
| 163 | H | 0.111431325 | 0.581926670 | 0.618448349 |
| 164 | H | 0.888568666 | 0.418073330 | 0.381551656 |
| 165 | H | 0.388568666 | 0.081926670 | 0.881551659 |
| 166 | H | 0.611431329 | 0.918073330 | 0.118448319 |
| 167 | H | 0.201834873 | 0.721679362 | 0.728988504 |
| 168 | H | 0.798165108 | 0.278320638 | 0.271011501 |
| 169 | H | 0.298165128 | 0.221679380 | 0.771011503 |
| 170 | H | 0.701834855 | 0.778320638 | 0.228988515 |

### S3.3. ZI\_O

Energy (eV): -1123.91

Simulation cell vectors (Å):

|     |              |              |              |
|-----|--------------|--------------|--------------|
| a = | 11.936203796 | 0.033475449  | 0.361242463  |
| b = | 0.036476789  | 12.757997540 | -0.020526162 |
| c = | -2.035129827 | -0.033008799 | 17.281740387 |

Fractional coordinates:

| No. | Element | X            | Y            | Z           |
|-----|---------|--------------|--------------|-------------|
| 1   | Zn      | 0.696856175  | 0.533112835  | 0.196014815 |
| 2   | Zn      | 0.304308910  | 0.463911448  | 0.802602353 |
| 3   | Zn      | 0.804355809  | 0.034235806  | 0.303281909 |
| 4   | Zn      | 0.196118682  | 0.966602647  | 0.695800520 |
| 5   | Cu      | 0.031079965  | 0.663963851  | 0.448587762 |
| 6   | Cu      | 0.965180570  | 0.335986188  | 0.552524461 |
| 7   | Cu      | 0.465010045  | 0.163522955  | 0.053129253 |
| 8   | Cu      | 0.534791146  | 0.833992911  | 0.946045417 |
| 9   | Cu      | 0.502619490  | 0.519071691  | 0.502324528 |
| 10  | Cu      | -0.000035887 | -0.000322166 | 0.999541757 |
| 11  | N       | 0.670406905  | 0.414465876  | 0.122135849 |
| 12  | N       | 0.330241395  | 0.583018492  | 0.875873436 |
| 13  | N       | 0.828839965  | 0.916757647  | 0.377557665 |
| 14  | N       | 0.170343136  | 0.083985140  | 0.621014077 |
| 15  | N       | 0.573736249  | 0.280340060  | 0.066679028 |
| 16  | N       | 0.425948340  | 0.717177650  | 0.932052368 |
| 17  | N       | 0.922601611  | 0.781441291  | 0.434117827 |
| 18  | N       | 0.074838901  | 0.219022630  | 0.565369054 |
| 19  | N       | 0.582319374  | 0.527743377  | 0.273368280 |
| 20  | N       | 0.418596565  | 0.467007186  | 0.724863924 |
| 21  | N       | 0.919280091  | 0.025109687  | 0.226524982 |
| 22  | N       | 0.080990065  | 0.977607909  | 0.772513826 |
| 23  | N       | 0.509164435  | 0.522712552  | 0.387465362 |
| 24  | N       | 0.491893479  | 0.475020069  | 0.611192586 |
| 25  | N       | 0.992662341  | 0.017021040  | 0.112518695 |
| 26  | N       | 0.007442229  | 0.984204595  | 0.886507970 |
| 27  | N       | 0.845917011  | 0.546004696  | 0.255905841 |



|    |   |             |             |             |
|----|---|-------------|-------------|-------------|
| 28 | N | 0.153983877 | 0.450222194 | 0.744444085 |
| 29 | N | 0.654662659 | 0.047259453 | 0.244429193 |
| 30 | N | 0.345650040 | 0.951754038 | 0.754741014 |
| 31 | N | 0.972122788 | 0.600717222 | 0.349841377 |
| 32 | N | 0.025533192 | 0.396244749 | 0.651763254 |
| 33 | N | 0.525946574 | 0.101473504 | 0.151788572 |
| 34 | N | 0.473691467 | 0.896418679 | 0.847467518 |
| 35 | N | 0.158466826 | 0.564084265 | 0.458132474 |
| 36 | N | 0.842087204 | 0.440626933 | 0.543206597 |
| 37 | N | 0.340537843 | 0.061462878 | 0.043185697 |
| 38 | N | 0.659586746 | 0.935904796 | 0.955775447 |
| 39 | N | 0.335866189 | 0.512036166 | 0.484144601 |
| 40 | N | 0.668806832 | 0.504670340 | 0.518426239 |
| 41 | N | 0.165565078 | 0.003010483 | 0.015911699 |
| 42 | N | 0.834360362 | 0.994916504 | 0.983130932 |
| 43 | N | 0.085063500 | 0.720095031 | 0.550764038 |
| 44 | N | 0.909609522 | 0.280200003 | 0.450924790 |
| 45 | N | 0.409946402 | 0.219350892 | 0.950999348 |
| 46 | N | 0.590007926 | 0.778195186 | 0.048266394 |
| 47 | N | 0.159189038 | 0.832860906 | 0.639332536 |
| 48 | N | 0.839188107 | 0.167913783 | 0.360790879 |
| 49 | N | 0.338579179 | 0.331337091 | 0.861007650 |
| 50 | N | 0.662317449 | 0.666215837 | 0.138048183 |
| 51 | O | 0.499657552 | 0.665463626 | 0.530397556 |
| 52 | C | 0.593914540 | 0.339058452 | 0.130772783 |
| 53 | C | 0.406074078 | 0.659124659 | 0.867580948 |
| 54 | C | 0.904547702 | 0.839543103 | 0.369769886 |
| 55 | C | 0.094274484 | 0.160670597 | 0.629499044 |
| 56 | C | 0.701189816 | 0.402909471 | 0.047734403 |
| 57 | C | 0.299511648 | 0.593401240 | 0.950374748 |
| 58 | C | 0.796319473 | 0.907139807 | 0.451558146 |
| 59 | C | 0.201705545 | 0.094248158 | 0.546752089 |
| 60 | C | 0.641200579 | 0.320602215 | 0.013543596 |
| 61 | C | 0.358904925 | 0.675759858 | 0.985006679 |
| 62 | C | 0.854579926 | 0.824104704 | 0.486461104 |
| 63 | C | 0.142450902 | 0.177182838 | 0.512394503 |
| 64 | C | 0.597783734 | 0.498004491 | 0.347649649 |
| 65 | C | 0.404566476 | 0.501539597 | 0.651802170 |
| 66 | C | 0.901978555 | 0.998818459 | 0.151510138 |
| 67 | C | 0.098185185 | 0.002987377 | 0.847698194 |
| 68 | C | 0.477500085 | 0.575191553 | 0.265163173 |
| 69 | C | 0.521945914 | 0.416657956 | 0.731828231 |
| 70 | C | 0.027928319 | 0.062655060 | 0.236475555 |
| 71 | C | 0.972364082 | 0.940030574 | 0.762263789 |
| 72 | C | 0.432474086 | 0.571668754 | 0.335302515 |
| 73 | C | 0.567648521 | 0.422781962 | 0.661943888 |
| 74 | C | 0.073336046 | 0.057169526 | 0.166538735 |
| 75 | C | 0.926876589 | 0.944582245 | 0.832199930 |

|     |   |             |             |             |
|-----|---|-------------|-------------|-------------|
| 76  | C | 0.862493025 | 0.597162066 | 0.323825548 |
| 77  | C | 0.135886352 | 0.401973885 | 0.675527131 |
| 78  | C | 0.635997684 | 0.098178418 | 0.176812969 |
| 79  | C | 0.363609492 | 0.901409868 | 0.822688090 |
| 80  | C | 0.951394696 | 0.515852407 | 0.237053956 |
| 81  | C | 0.048847495 | 0.475932477 | 0.766442196 |
| 82  | C | 0.550179140 | 0.016863725 | 0.264248738 |
| 83  | C | 0.450646362 | 0.979705048 | 0.734458673 |
| 84  | C | 0.029191604 | 0.549365131 | 0.294909441 |
| 85  | C | 0.969635651 | 0.442892761 | 0.709329523 |
| 86  | C | 0.470870216 | 0.050090296 | 0.207178663 |
| 87  | C | 0.529510271 | 0.945863443 | 0.791584661 |
| 88  | C | 0.264744346 | 0.594053919 | 0.479276827 |
| 89  | C | 0.734297529 | 0.418599941 | 0.518949043 |
| 90  | C | 0.233018221 | 0.087203903 | 0.020435952 |
| 91  | C | 0.767186957 | 0.910516419 | 0.978608382 |
| 92  | C | 0.162303373 | 0.456477123 | 0.449412728 |
| 93  | C | 0.845091808 | 0.546882706 | 0.558861602 |
| 94  | C | 0.341639563 | 0.954220937 | 0.053425084 |
| 95  | C | 0.658132230 | 0.043146512 | 0.945481235 |
| 96  | C | 0.272260134 | 0.424188415 | 0.465866223 |
| 97  | C | 0.737810231 | 0.586357181 | 0.543283707 |
| 98  | C | 0.233524499 | 0.918199283 | 0.036334189 |
| 99  | C | 0.766117727 | 0.079475877 | 0.962540254 |
| 100 | C | 0.108727311 | 0.821170770 | 0.567616056 |
| 101 | C | 0.885488161 | 0.179273514 | 0.433622405 |
| 102 | C | 0.385990137 | 0.320313733 | 0.933619845 |
| 103 | C | 0.613424225 | 0.677154799 | 0.065810783 |
| 104 | C | 0.122627127 | 0.663796261 | 0.615751491 |
| 105 | C | 0.876974754 | 0.336685862 | 0.385059514 |
| 106 | C | 0.375940978 | 0.162461847 | 0.885425941 |
| 107 | C | 0.625902509 | 0.835228835 | 0.113407955 |
| 108 | C | 0.167665619 | 0.733416186 | 0.670495862 |
| 109 | C | 0.834120702 | 0.267304035 | 0.329396220 |
| 110 | C | 0.332487742 | 0.231545353 | 0.829853017 |
| 111 | C | 0.669914847 | 0.766190318 | 0.168844383 |
| 112 | H | 0.553312748 | 0.327564084 | 0.183508036 |
| 113 | H | 0.446377312 | 0.671720778 | 0.814843495 |
| 114 | H | 0.946154785 | 0.826314795 | 0.317530586 |
| 115 | H | 0.053389453 | 0.173288769 | 0.682103074 |
| 116 | H | 0.762588763 | 0.453835466 | 0.024763389 |
| 117 | H | 0.238508765 | 0.541809377 | 0.973087327 |
| 118 | H | 0.734446658 | 0.959257970 | 0.473609691 |
| 119 | H | 0.263035074 | 0.042147562 | 0.524008987 |
| 120 | H | 0.640613695 | 0.288747604 | 0.955687339 |
| 121 | H | 0.359308090 | 0.707007442 | 0.043029579 |
| 122 | H | 0.853396899 | 0.793034551 | 0.544226799 |
| 123 | H | 0.142664925 | 0.208656886 | 0.454631713 |

|     |   |             |             |             |
|-----|---|-------------|-------------|-------------|
| 124 | H | 0.673118196 | 0.458777257 | 0.372402666 |
| 125 | H | 0.332349194 | 0.546528794 | 0.628424633 |
| 126 | H | 0.824056291 | 0.966091289 | 0.125625274 |
| 127 | H | 0.176130337 | 0.035414887 | 0.873790040 |
| 128 | H | 0.443975643 | 0.608681696 | 0.210657150 |
| 129 | H | 0.553562428 | 0.378464353 | 0.785020892 |
| 130 | H | 0.063880258 | 0.091336140 | 0.291964439 |
| 131 | H | 0.936549177 | 0.911819838 | 0.706602277 |
| 132 | H | 0.352672945 | 0.600967891 | 0.351748332 |
| 133 | H | 0.646806057 | 0.392823492 | 0.644789912 |
| 134 | H | 0.156054295 | 0.079125295 | 0.151410911 |
| 135 | H | 0.844171704 | 0.922292963 | 0.847145032 |
| 136 | H | 0.795563515 | 0.630954292 | 0.354456066 |
| 137 | H | 0.202198946 | 0.372031242 | 0.642512899 |
| 138 | H | 0.701748679 | 0.131950366 | 0.145624616 |
| 139 | H | 0.297339956 | 0.869328417 | 0.854263512 |
| 140 | H | 0.963247860 | 0.472316136 | 0.184678153 |
| 141 | H | 0.038189417 | 0.516339987 | 0.820307498 |
| 142 | H | 0.540099378 | 0.973286518 | 0.316602836 |
| 143 | H | 0.461488275 | 0.021589966 | 0.681504940 |
| 144 | H | 0.119687591 | 0.539434705 | 0.301462648 |
| 145 | H | 0.878874297 | 0.450458249 | 0.704918224 |
| 146 | H | 0.380528104 | 0.039794156 | 0.201475629 |
| 147 | H | 0.620090984 | 0.954202492 | 0.796878564 |
| 148 | H | 0.290377897 | 0.674227577 | 0.491908363 |
| 149 | H | 0.705060585 | 0.341213101 | 0.500983562 |
| 150 | H | 0.204977303 | 0.166447070 | 0.006437250 |
| 151 | H | 0.795487820 | 0.831359873 | 0.992648124 |
| 152 | H | 0.088060802 | 0.411627331 | 0.430440722 |
| 153 | H | 0.921598643 | 0.585711253 | 0.581255501 |
| 154 | H | 0.417636505 | 0.912117102 | 0.073532011 |
| 155 | H | 0.582055322 | 0.085006331 | 0.925224751 |
| 156 | H | 0.309075791 | 0.346315916 | 0.466135425 |
| 157 | H | 0.704760238 | 0.665339821 | 0.547560476 |
| 158 | H | 0.200713530 | 0.839165838 | 0.037041562 |
| 159 | H | 0.798699421 | 0.158588203 | 0.961742180 |
| 160 | H | 0.088675793 | 0.885738404 | 0.528303591 |
| 161 | H | 0.902711762 | 0.114607641 | 0.473319352 |
| 162 | H | 0.404089165 | 0.385298989 | 0.973088037 |
| 163 | H | 0.594168793 | 0.612061050 | 0.026636831 |
| 164 | H | 0.115255966 | 0.579294125 | 0.618053477 |
| 165 | H | 0.886351851 | 0.420993881 | 0.382891349 |
| 166 | H | 0.384839627 | 0.077965626 | 0.883253911 |
| 167 | H | 0.617642621 | 0.919793911 | 0.115435225 |
| 168 | H | 0.204141902 | 0.719493291 | 0.728904741 |
| 169 | H | 0.801390380 | 0.281431018 | 0.270177984 |
| 170 | H | 0.298701574 | 0.217027494 | 0.770873000 |
| 171 | H | 0.704798892 | 0.780841102 | 0.227559995 |

### S3.4. CH<sub>4</sub>/ZI

Energy (eV): -1145.62

Simulation cell vectors (Å):

|     |              |              |              |
|-----|--------------|--------------|--------------|
| a = | 11.900190288 | 0.016974350  | -0.000918454 |
| b = | 0.015221667  | 12.739447978 | -0.005982152 |
| c = | -1.322813592 | -0.013588514 | 17.316710877 |

Fractional coordinates:

| No | Elements | X            | Y            | Z           |
|----|----------|--------------|--------------|-------------|
| 1  | Zn       | 0.675345033  | 0.531306684  | 0.206008035 |
| 2  | Zn       | 0.276106339  | 0.462858798  | 0.815337722 |
| 3  | Zn       | 0.777792073  | 0.031916894  | 0.315186473 |
| 4  | Zn       | 0.176002495  | 0.963135844  | 0.705768406 |
| 5  | Cu       | 0.007661176  | 0.662022113  | 0.458590760 |
| 6  | Cu       | 0.942275062  | 0.332498570  | 0.563570929 |
| 7  | Cu       | 0.443157743  | 0.162223635  | 0.064035581 |
| 8  | Cu       | 0.510966149  | 0.831824695  | 0.957043648 |
| 9  | Cu       | 0.475490847  | 0.499366422  | 0.510457615 |
| 10 | Cu       | -0.022961131 | -0.003354334 | 0.010642663 |
| 11 | N        | 0.650041859  | 0.412823732  | 0.132027023 |
| 12 | N        | 0.303049504  | 0.581212228  | 0.889471478 |
| 13 | N        | 0.803163202  | 0.914766939  | 0.390227904 |
| 14 | N        | 0.149190292  | 0.080764611  | 0.631256451 |
| 15 | N        | 0.553026586  | 0.278527681  | 0.077146812 |
| 16 | N        | 0.401281987  | 0.714855557  | 0.944347030 |
| 17 | N        | 0.898228672  | 0.779403359  | 0.445599825 |
| 18 | N        | 0.052475713  | 0.215374137  | 0.576099943 |
| 19 | N        | 0.559134677  | 0.523762931  | 0.283236618 |
| 20 | N        | 0.390880286  | 0.472021925  | 0.737206270 |
| 21 | N        | 0.893767180  | 0.021290773  | 0.238011325 |
| 22 | N        | 0.060126411  | 0.971581704  | 0.783288557 |
| 23 | N        | 0.484345491  | 0.516631581  | 0.397512449 |
| 24 | N        | 0.466413775  | 0.481438031  | 0.623273364 |
| 25 | N        | 0.968813854  | 0.012832178  | 0.123811931 |
| 26 | N        | -0.014344209 | -0.021367742 | 0.897719764 |
| 27 | N        | 0.824283346  | 0.545679800  | 0.265201395 |
| 28 | N        | 0.126222412  | 0.447600204  | 0.757229034 |
| 29 | N        | 0.628137199  | 0.045484481  | 0.256719505 |
| 30 | N        | 0.325635776  | 0.948420838  | 0.764259891 |
| 31 | N        | 0.949949448  | 0.600917211  | 0.358816327 |
| 32 | N        | 0.000263258  | 0.393256396  | 0.663431050 |
| 33 | N        | 0.501258288  | 0.100344686  | 0.163597534 |
| 34 | N        | 0.452010212  | 0.893256680  | 0.857603787 |
| 35 | N        | 0.133232523  | 0.559895551  | 0.467898200 |

|    |   |             |              |              |
|----|---|-------------|--------------|--------------|
| 36 | N | 0.816735928 | 0.435088283  | 0.554287416  |
| 37 | N | 0.317924147 | 0.060440504  | 0.054118575  |
| 38 | N | 0.635821886 | 0.934568698  | 0.966734336  |
| 39 | N | 0.309427176 | 0.502446218  | 0.494135258  |
| 40 | N | 0.641620107 | 0.494869190  | 0.526678961  |
| 41 | N | 0.142939962 | 0.001537416  | 0.026268473  |
| 42 | N | 0.811030206 | 0.993559236  | -0.005472076 |
| 43 | N | 0.062093652 | 0.717744735  | 0.560886717  |
| 44 | N | 0.888488534 | 0.277275315  | 0.461135883  |
| 45 | N | 0.389483283 | 0.218004390  | 0.961595158  |
| 46 | N | 0.565380583 | 0.776023986  | 0.059181821  |
| 47 | N | 0.139650264 | 0.829519395  | 0.648715594  |
| 48 | N | 0.814304254 | 0.165604936  | 0.372010325  |
| 49 | N | 0.314551459 | 0.329681678  | 0.872643127  |
| 50 | N | 0.639244839 | 0.664493131  | 0.148510504  |
| 51 | C | 0.573293167 | 0.337141895  | 0.141238574  |
| 52 | C | 0.379473986 | 0.657121279  | 0.879968055  |
| 53 | C | 0.878040140 | 0.837045507  | 0.381077292  |
| 54 | C | 0.073025071 | 0.157412329  | 0.640415195  |
| 55 | C | 0.680866656 | 0.401669472  | 0.057237936  |
| 56 | C | 0.274096148 | 0.591273623  | 0.964767883  |
| 57 | C | 0.773547910 | 0.906103165  | 0.465421450  |
| 58 | C | 0.179301760 | 0.090526325  | 0.556243053  |
| 59 | C | 0.620683093 | 0.319216450  | 0.023425904  |
| 60 | C | 0.335090635 | 0.673207293  | -0.001367462 |
| 61 | C | 0.832495184 | 0.822959588  | 0.499570267  |
| 62 | C | 0.119340919 | 0.173183500  | 0.522243023  |
| 63 | C | 0.575143953 | 0.496086909  | 0.358017349  |
| 64 | C | 0.375030129 | 0.500459779  | 0.662578776  |
| 65 | C | 0.877157565 | 0.994998746  | 0.162973593  |
| 66 | C | 0.076109262 | -0.000590456 | 0.858075510  |
| 67 | C | 0.451286209 | 0.564761715  | 0.274067414  |
| 68 | C | 0.499151157 | 0.432120045  | 0.746443609  |
| 69 | C | 0.002962333 | 0.058425151  | 0.247759358  |
| 70 | C | 0.952640676 | 0.930228681  | 0.774282874  |
| 71 | C | 0.404978580 | 0.559829097  | 0.344188909  |
| 72 | C | 0.545938037 | 0.438447333  | 0.676564216  |
| 73 | C | 0.049398764 | 0.052705354  | 0.177705615  |
| 74 | C | 0.906536130 | 0.935086578  | 0.844493283  |
| 75 | C | 0.840203855 | 0.596359556  | 0.333316624  |
| 76 | C | 0.110124025 | 0.398349347  | 0.688556669  |
| 77 | C | 0.611192901 | 0.096044629  | 0.188712849  |
| 78 | C | 0.342017755 | 0.899098115  | 0.832817558  |
| 79 | C | 0.930400536 | 0.516942744  | 0.245594758  |
| 80 | C | 0.020017102 | 0.474781985  | 0.777615695  |
| 81 | C | 0.522469062 | 0.016417079  | 0.276721463  |
| 82 | C | 0.431719863 | 0.974909235  | 0.743598295  |
| 83 | C | 0.007808859 | 0.550760889  | 0.303270073  |

|     |   |             |             |             |
|-----|---|-------------|-------------|-------------|
| 84  | C | 0.942405199 | 0.441577088 | 0.719827851 |
| 85  | C | 0.444302187 | 0.049996462 | 0.219331919 |
| 86  | C | 0.509574886 | 0.941243958 | 0.801129166 |
| 87  | C | 0.240386186 | 0.586264713 | 0.490731637 |
| 88  | C | 0.709438531 | 0.410173241 | 0.530642937 |
| 89  | C | 0.210449884 | 0.086098996 | 0.031264519 |
| 90  | C | 0.742988029 | 0.909336296 | 0.990866455 |
| 91  | C | 0.134013559 | 0.452693875 | 0.456430472 |
| 92  | C | 0.817265238 | 0.542348295 | 0.565746910 |
| 93  | C | 0.318998654 | 0.952935160 | 0.063839203 |
| 94  | C | 0.635581192 | 0.041635108 | 0.954749577 |
| 95  | C | 0.242915588 | 0.417269642 | 0.472898248 |
| 96  | C | 0.709108492 | 0.579164586 | 0.548449573 |
| 97  | C | 0.210846080 | 0.916634703 | 0.046423277 |
| 98  | C | 0.743805043 | 0.077943162 | 0.972066669 |
| 99  | C | 0.089176115 | 0.818442210 | 0.577136865 |
| 100 | C | 0.863284991 | 0.176423274 | 0.444037708 |
| 101 | C | 0.363562165 | 0.318824385 | 0.944687101 |
| 102 | C | 0.591962380 | 0.675325727 | 0.076035522 |
| 103 | C | 0.097183636 | 0.661098681 | 0.626193300 |
| 104 | C | 0.853690183 | 0.334321048 | 0.395969962 |
| 105 | C | 0.355236823 | 0.160983705 | 0.896272729 |
| 106 | C | 0.597417570 | 0.832913011 | 0.124984591 |
| 107 | C | 0.144427323 | 0.730072038 | 0.680450065 |
| 108 | C | 0.808588054 | 0.265419102 | 0.340910317 |
| 109 | C | 0.309648808 | 0.229880207 | 0.841341764 |
| 110 | C | 0.642312725 | 0.764078063 | 0.180196803 |
| 111 | C | 0.468714202 | 0.787716025 | 0.520596586 |
| 112 | H | 0.532383337 | 0.325507498 | 0.194312767 |
| 113 | H | 0.419058786 | 0.669518710 | 0.826464544 |
| 114 | H | 0.917630690 | 0.823184584 | 0.327712818 |
| 115 | H | 0.032750892 | 0.170214057 | 0.693647443 |
| 116 | H | 0.742543843 | 0.452815926 | 0.033794163 |
| 117 | H | 0.213082433 | 0.539729620 | 0.988521627 |
| 118 | H | 0.713767845 | 0.959581187 | 0.488904989 |
| 119 | H | 0.240595624 | 0.038519743 | 0.532856089 |
| 120 | H | 0.620002924 | 0.287534482 | 0.965454203 |
| 121 | H | 0.337045417 | 0.704140786 | 0.056883700 |
| 122 | H | 0.833500986 | 0.792515045 | 0.557852434 |
| 123 | H | 0.118481067 | 0.204197237 | 0.464117867 |
| 124 | H | 0.652315821 | 0.460986233 | 0.383353622 |
| 125 | H | 0.297689404 | 0.535192493 | 0.637210459 |
| 126 | H | 0.799031574 | 0.962569556 | 0.137210706 |
| 127 | H | 0.152974724 | 0.034913299 | 0.883297324 |
| 128 | H | 0.416612402 | 0.595320433 | 0.218964458 |
| 129 | H | 0.533860080 | 0.401366321 | 0.801478050 |
| 130 | H | 0.038502793 | 0.087111735 | 0.303212275 |
| 131 | H | 0.918118564 | 0.899428901 | 0.719205450 |

|     |   |             |             |             |
|-----|---|-------------|-------------|-------------|
| 132 | H | 0.322475972 | 0.583990450 | 0.359945703 |
| 133 | H | 0.628807349 | 0.415177497 | 0.660969338 |
| 134 | H | 0.132724585 | 0.074411041 | 0.162390856 |
| 135 | H | 0.824354802 | 0.910534898 | 0.860340330 |
| 136 | H | 0.772643395 | 0.628912549 | 0.364533081 |
| 137 | H | 0.177731561 | 0.367141679 | 0.656712503 |
| 138 | H | 0.678209342 | 0.128825012 | 0.157302731 |
| 139 | H | 0.274597259 | 0.868274427 | 0.864814216 |
| 140 | H | 0.942886756 | 0.474091183 | 0.192884704 |
| 141 | H | 0.007618605 | 0.516280484 | 0.830907064 |
| 142 | H | 0.510835695 | 0.973535276 | 0.329447139 |
| 143 | H | 0.443936524 | 0.015968953 | 0.690203710 |
| 144 | H | 0.098603089 | 0.541588457 | 0.309310017 |
| 145 | H | 0.851515470 | 0.449986531 | 0.714229391 |
| 146 | H | 0.353593118 | 0.040512544 | 0.213596322 |
| 147 | H | 0.600507106 | 0.948900057 | 0.806405489 |
| 148 | H | 0.267092148 | 0.665559961 | 0.505546614 |
| 149 | H | 0.681798153 | 0.331169604 | 0.515608374 |
| 150 | H | 0.182545416 | 0.165520394 | 0.017557499 |
| 151 | H | 0.770390138 | 0.830360750 | 0.006457635 |
| 152 | H | 0.058855852 | 0.410147868 | 0.435834271 |
| 153 | H | 0.892791012 | 0.583933721 | 0.586881270 |
| 154 | H | 0.394799485 | 0.910846644 | 0.084136009 |
| 155 | H | 0.560243627 | 0.083554703 | 0.933301949 |
| 156 | H | 0.277171844 | 0.338406562 | 0.471263973 |
| 157 | H | 0.675854446 | 0.658388840 | 0.549923749 |
| 158 | H | 0.178012587 | 0.837339815 | 0.046709580 |
| 159 | H | 0.777093269 | 0.156963704 | 0.970124930 |
| 160 | H | 0.071211637 | 0.883226455 | 0.537547779 |
| 161 | H | 0.881546870 | 0.111346457 | 0.483314931 |
| 162 | H | 0.381265536 | 0.383891943 | 0.984110816 |
| 163 | H | 0.575770212 | 0.610369994 | 0.036268538 |
| 164 | H | 0.086537383 | 0.576782670 | 0.629085437 |
| 165 | H | 0.863205643 | 0.418800333 | 0.393720912 |
| 166 | H | 0.365287471 | 0.076508499 | 0.893800535 |
| 167 | H | 0.586645945 | 0.917302898 | 0.127535422 |
| 168 | H | 0.179846624 | 0.715736261 | 0.738948897 |
| 169 | H | 0.773908287 | 0.280077323 | 0.282284300 |
| 170 | H | 0.275218617 | 0.215264117 | 0.782647055 |
| 171 | H | 0.675192141 | 0.778597627 | 0.239239653 |
| 172 | H | 0.466878285 | 0.730979445 | 0.472913272 |
| 173 | H | 0.545345878 | 0.835168733 | 0.519788532 |
| 174 | H | 0.468427864 | 0.746541402 | 0.576006761 |
| 175 | H | 0.394369977 | 0.838869359 | 0.513345699 |

### S3.5. CH<sub>4</sub>\_ads\_s/ZI\_O

Energy (eV): -1148.28

Simulation cell vectors (Å):

|     |              |              |              |
|-----|--------------|--------------|--------------|
| a = | 11.795000076 | 0.000000000  | 0.000000000  |
| b = | -0.015655182 | 12.813990566 | 0.000000000  |
| c = | -1.452735456 | 0.007372060  | 17.409491129 |

Fractional coordinates:

| No. | Element | X           | Y           | Z           |
|-----|---------|-------------|-------------|-------------|
| 1   | Zn      | 0.677774248 | 0.527659293 | 0.208497853 |
| 2   | Zn      | 0.286902094 | 0.455180836 | 0.811778353 |
| 3   | Zn      | 0.784246682 | 0.037171144 | 0.317557971 |
| 4   | Zn      | 0.172942737 | 0.966857681 | 0.709547189 |
| 5   | Cu      | 0.016257593 | 0.670241211 | 0.457780077 |
| 6   | Cu      | 0.940629823 | 0.337087823 | 0.565166146 |
| 7   | Cu      | 0.448276573 | 0.161273374 | 0.064921753 |
| 8   | Cu      | 0.509392981 | 0.828207962 | 0.960331994 |
| 9   | Cu      | 0.482396292 | 0.514192378 | 0.511729883 |
| 10  | Cu      | 0.978516122 | 0.995225153 | 0.013859000 |
| 11  | N       | 0.656757839 | 0.411107849 | 0.132816593 |
| 12  | N       | 0.313362028 | 0.574470865 | 0.883584553 |
| 13  | N       | 0.811266334 | 0.921719869 | 0.392846021 |
| 14  | N       | 0.146341626 | 0.085728859 | 0.636220594 |
| 15  | N       | 0.560356115 | 0.276818656 | 0.077148032 |
| 16  | N       | 0.402803552 | 0.709972371 | 0.942403735 |
| 17  | N       | 0.904087637 | 0.784378429 | 0.446217699 |
| 18  | N       | 0.049770184 | 0.219296785 | 0.579920493 |
| 19  | N       | 0.564852031 | 0.497827128 | 0.285390043 |
| 20  | N       | 0.397798339 | 0.443081585 | 0.731432260 |
| 21  | N       | 0.899742518 | 0.026211066 | 0.240319646 |
| 22  | N       | 0.056742685 | 0.974450829 | 0.786631552 |
| 23  | N       | 0.489902348 | 0.482171284 | 0.398384787 |
| 24  | N       | 0.465222427 | 0.449397147 | 0.615826735 |
| 25  | N       | 0.972375659 | 0.015381564 | 0.126223572 |
| 26  | N       | 0.984076357 | 0.979686571 | 0.900979461 |
| 27  | N       | 0.828506703 | 0.550271091 | 0.266735279 |
| 28  | N       | 0.133018097 | 0.448144836 | 0.755261304 |
| 29  | N       | 0.633173922 | 0.049649962 | 0.259036413 |
| 30  | N       | 0.323579475 | 0.950653416 | 0.769210890 |
| 31  | N       | 0.955790425 | 0.607822475 | 0.359359876 |
| 32  | N       | 0.001546674 | 0.397384732 | 0.663241915 |
| 33  | N       | 0.506456034 | 0.102170759 | 0.164608835 |
| 34  | N       | 0.450811306 | 0.892521364 | 0.861664290 |
| 35  | N       | 0.145611376 | 0.571479766 | 0.464998425 |
| 36  | N       | 0.816758542 | 0.442213694 | 0.554747054 |
| 37  | N       | 0.322319668 | 0.058748645 | 0.056414099 |
| 38  | N       | 0.634435524 | 0.930585946 | 0.972426312 |



|    |   |             |             |             |
|----|---|-------------|-------------|-------------|
| 39 | N | 0.321408395 | 0.516931124 | 0.495831300 |
| 40 | N | 0.643503967 | 0.508507114 | 0.531157915 |
| 41 | N | 0.145839398 | 0.998134018 | 0.029141512 |
| 42 | N | 0.811229567 | 0.989931964 | 0.999559328 |
| 43 | N | 0.072032614 | 0.723528981 | 0.559857592 |
| 44 | N | 0.889098896 | 0.283172480 | 0.463125320 |
| 45 | N | 0.391756193 | 0.215812959 | 0.963181535 |
| 46 | N | 0.561503799 | 0.771544605 | 0.063086405 |
| 47 | N | 0.140210072 | 0.834452240 | 0.651041458 |
| 48 | N | 0.820601107 | 0.171218279 | 0.372890384 |
| 49 | N | 0.315502678 | 0.324892715 | 0.873378046 |
| 50 | N | 0.632268432 | 0.659906454 | 0.153227275 |
| 51 | N | 0.481848910 | 0.664151624 | 0.533560585 |
| 52 | O | 0.581998062 | 0.333198200 | 0.141725233 |
| 53 | C | 0.389247500 | 0.652194666 | 0.877905073 |
| 54 | C | 0.885276073 | 0.843879822 | 0.382886383 |
| 55 | C | 0.067650722 | 0.160496844 | 0.643694885 |
| 56 | C | 0.684867597 | 0.403658094 | 0.057713154 |
| 57 | C | 0.275781237 | 0.583516806 | 0.956222684 |
| 58 | C | 0.780752912 | 0.911117086 | 0.467211368 |
| 59 | C | 0.181208121 | 0.097960079 | 0.563081703 |
| 60 | C | 0.625175268 | 0.321193759 | 0.023411044 |
| 61 | C | 0.331333391 | 0.666751928 | 0.992489676 |
| 62 | C | 0.838250827 | 0.826687816 | 0.500102372 |
| 63 | C | 0.121378827 | 0.179964041 | 0.528340937 |
| 64 | C | 0.585984400 | 0.486134597 | 0.361741383 |
| 65 | C | 0.391547155 | 0.490420431 | 0.662327194 |
| 66 | C | 0.882493827 | 0.994919080 | 0.166740666 |
| 67 | C | 0.074958186 | 0.999963685 | 0.861365794 |
| 68 | C | 0.447704472 | 0.501673684 | 0.272108461 |
| 69 | C | 0.480886545 | 0.367429633 | 0.728773296 |
| 70 | C | 0.007467576 | 0.069468067 | 0.247556022 |
| 71 | C | 0.947261780 | 0.935183396 | 0.777624578 |
| 72 | C | 0.401558256 | 0.492057550 | 0.341532954 |
| 73 | C | 0.522971979 | 0.371890899 | 0.657521038 |
| 74 | C | 0.052453764 | 0.062291451 | 0.177558198 |
| 75 | C | 0.902308519 | 0.938909534 | 0.847776824 |
| 76 | C | 0.844903047 | 0.602713810 | 0.333634566 |
| 77 | C | 0.113365643 | 0.401635926 | 0.686383778 |
| 78 | C | 0.617406255 | 0.094921203 | 0.189343578 |
| 79 | C | 0.339912884 | 0.898074041 | 0.836103357 |
| 80 | C | 0.935537637 | 0.520973659 | 0.248215596 |
| 81 | C | 0.027285154 | 0.474404979 | 0.777927458 |
| 82 | C | 0.525652793 | 0.027574877 | 0.280538040 |
| 83 | C | 0.430672674 | 0.979427386 | 0.750448731 |
| 84 | C | 0.013906384 | 0.556247214 | 0.305246568 |
| 85 | C | 0.946151669 | 0.443312153 | 0.721193438 |
| 86 | C | 0.447518386 | 0.059586761 | 0.222272266 |

|     |   |             |             |             |
|-----|---|-------------|-------------|-------------|
| 87  | C | 0.509020924 | 0.943894986 | 0.807364721 |
| 88  | C | 0.254130068 | 0.600703459 | 0.483134844 |
| 89  | C | 0.707828243 | 0.421733526 | 0.530029853 |
| 90  | C | 0.213931946 | 0.082489517 | 0.031873644 |
| 91  | C | 0.743108257 | 0.905618451 | 0.995234142 |
| 92  | C | 0.144331561 | 0.463606310 | 0.466280040 |
| 93  | C | 0.821307772 | 0.547527587 | 0.572093114 |
| 94  | C | 0.323340846 | 0.952665358 | 0.069920477 |
| 95  | C | 0.633238589 | 0.037321526 | 0.962003548 |
| 96  | C | 0.253653603 | 0.429364582 | 0.485870482 |
| 97  | C | 0.713813529 | 0.588766272 | 0.557559473 |
| 98  | C | 0.214316032 | 0.915318949 | 0.052890854 |
| 99  | C | 0.742477915 | 0.073952815 | 0.979059071 |
| 100 | C | 0.091643689 | 0.824204599 | 0.578980455 |
| 101 | C | 0.864566997 | 0.182674660 | 0.445940321 |
| 102 | C | 0.367002855 | 0.315854447 | 0.944809530 |
| 103 | C | 0.584582078 | 0.670967945 | 0.080868742 |
| 104 | C | 0.110659741 | 0.665848882 | 0.623668365 |
| 105 | C | 0.859346858 | 0.339176806 | 0.396875102 |
| 106 | C | 0.354187335 | 0.157531211 | 0.899507032 |
| 107 | C | 0.596482191 | 0.828163272 | 0.128221678 |
| 108 | C | 0.152017700 | 0.734317860 | 0.679999861 |
| 109 | C | 0.817573380 | 0.270045948 | 0.341151711 |
| 110 | C | 0.307620000 | 0.224735595 | 0.844072586 |
| 111 | C | 0.639522366 | 0.759386597 | 0.183763748 |
| 112 | C | 0.523555167 | 0.762516380 | 0.378013953 |
| 113 | H | 0.543541634 | 0.318262677 | 0.194958535 |
| 114 | H | 0.434082210 | 0.666500785 | 0.827102658 |
| 115 | H | 0.925383515 | 0.831369276 | 0.329950115 |
| 116 | H | 0.023928030 | 0.171550653 | 0.695352931 |
| 117 | H | 0.744477926 | 0.457165352 | 0.034350157 |
| 118 | H | 0.213119637 | 0.530385271 | 0.976489726 |
| 119 | H | 0.720001742 | 0.963107957 | 0.490743999 |
| 120 | H | 0.245122975 | 0.047695461 | 0.541292061 |
| 121 | H | 0.623036334 | 0.291962305 | 0.965102050 |
| 122 | H | 0.326514263 | 0.697431618 | 0.049913097 |
| 123 | H | 0.837668908 | 0.794228351 | 0.557326613 |
| 124 | H | 0.123471232 | 0.212108285 | 0.471045522 |
| 125 | H | 0.670702163 | 0.480266743 | 0.390227682 |
| 126 | H | 0.333666785 | 0.553814847 | 0.645846630 |
| 127 | H | 0.805093127 | 0.957286884 | 0.142999604 |
| 128 | H | 0.153790506 | 0.033419364 | 0.886562845 |
| 129 | H | 0.406372237 | 0.511494435 | 0.214707917 |
| 130 | H | 0.502083310 | 0.315278484 | 0.776765464 |
| 131 | H | 0.043046742 | 0.102917567 | 0.301342452 |
| 132 | H | 0.910535095 | 0.906541964 | 0.722594392 |
| 133 | H | 0.313338747 | 0.491095754 | 0.354245270 |
| 134 | H | 0.589202372 | 0.326079736 | 0.634251750 |

|     |   |             |             |             |
|-----|---|-------------|-------------|-------------|
| 135 | H | 0.134509715 | 0.087224254 | 0.160679749 |
| 136 | H | 0.819285767 | 0.915174899 | 0.863610177 |
| 137 | H | 0.777105850 | 0.636985144 | 0.363599712 |
| 138 | H | 0.179831852 | 0.371755457 | 0.653068534 |
| 139 | H | 0.685908391 | 0.122076817 | 0.156627431 |
| 140 | H | 0.271779223 | 0.864666415 | 0.866317785 |
| 141 | H | 0.947837448 | 0.476827067 | 0.196598214 |
| 142 | H | 0.017620325 | 0.513670134 | 0.831990017 |
| 143 | H | 0.512804846 | 0.990202114 | 0.334827459 |
| 144 | H | 0.443184132 | 0.023149013 | 0.698629258 |
| 145 | H | 0.105576256 | 0.548122416 | 0.311593016 |
| 146 | H | 0.854383378 | 0.451357391 | 0.717384314 |
| 147 | H | 0.355520505 | 0.053878730 | 0.217203724 |
| 148 | H | 0.600712829 | 0.952459115 | 0.813561154 |
| 149 | H | 0.285402572 | 0.680026302 | 0.488789205 |
| 150 | H | 0.676679016 | 0.346208892 | 0.509666304 |
| 151 | H | 0.185617907 | 0.160461544 | 0.015350018 |
| 152 | H | 0.771478012 | 0.826857058 | 0.009268431 |
| 153 | H | 0.067088567 | 0.419336538 | 0.451782696 |
| 154 | H | 0.899430551 | 0.584894875 | 0.594831909 |
| 155 | H | 0.399524978 | 0.912031866 | 0.092250731 |
| 156 | H | 0.556629787 | 0.078703365 | 0.941452098 |
| 157 | H | 0.287598055 | 0.351234341 | 0.493756446 |
| 158 | H | 0.679975828 | 0.666579820 | 0.563328072 |
| 159 | H | 0.181127436 | 0.836644691 | 0.056143324 |
| 160 | H | 0.775572512 | 0.152884669 | 0.978257873 |
| 161 | H | 0.069965480 | 0.889513948 | 0.541023557 |
| 162 | H | 0.879866487 | 0.118436862 | 0.485953787 |
| 163 | H | 0.387440967 | 0.381572813 | 0.982637658 |
| 164 | H | 0.566284135 | 0.606262677 | 0.041701596 |
| 165 | H | 0.106269801 | 0.581341817 | 0.624320373 |
| 166 | H | 0.870076302 | 0.423060378 | 0.394316674 |
| 167 | H | 0.362807328 | 0.073392849 | 0.898477782 |
| 168 | H | 0.588959940 | 0.912393558 | 0.130271102 |
| 169 | H | 0.187853639 | 0.719119808 | 0.738169603 |
| 170 | H | 0.786748309 | 0.283885653 | 0.281763825 |
| 171 | H | 0.270772171 | 0.208872762 | 0.786249330 |
| 172 | H | 0.673622387 | 0.774076159 | 0.242349314 |
| 173 | H | 0.601273404 | 0.809890479 | 0.382403859 |
| 174 | H | 0.503561439 | 0.739436841 | 0.436278380 |
| 175 | H | 0.535987444 | 0.692347094 | 0.343981085 |
| 176 | H | 0.452648482 | 0.807572149 | 0.350227523 |

### S3.6. CH<sub>4</sub>\_ads\_t/ZI\_O

Energy (eV): -1148.20

Simulation cell vectors (Å):

|     |              |              |              |
|-----|--------------|--------------|--------------|
| a = | 11.794765740 | -0.019322595 | -0.008837918 |
| b = | 0.005666084  | 12.813668225 | 0.007222792  |
| c = | -1.439626879 | -0.000055754 | 17.410206455 |

Fractional coordinates:

| No. | Elements | X           | Y           | Z           |
|-----|----------|-------------|-------------|-------------|
| 1   | Zn       | 0.678217064 | 0.531074904 | 0.207425406 |
| 2   | Zn       | 0.287356457 | 0.455300122 | 0.811243439 |
| 3   | Zn       | 0.782593286 | 0.034614978 | 0.316326426 |
| 4   | Zn       | 0.171887023 | 0.969192871 | 0.707856811 |
| 5   | Cu       | 0.012212592 | 0.667727285 | 0.460282196 |
| 6   | Cu       | 0.940069027 | 0.337694785 | 0.563454311 |
| 7   | Cu       | 0.444416835 | 0.162709304 | 0.065934576 |
| 8   | Cu       | 0.508653736 | 0.830630567 | 0.958136775 |
| 9   | Cu       | 0.479554106 | 0.512808533 | 0.511638076 |
| 10  | Cu       | 0.976380107 | 0.996641025 | 0.011928596 |
| 11  | N        | 0.653321353 | 0.413198596 | 0.133507768 |
| 12  | N        | 0.313903694 | 0.575507105 | 0.882407189 |
| 13  | N        | 0.806629744 | 0.917466172 | 0.390358642 |
| 14  | N        | 0.146320318 | 0.087176668 | 0.633975546 |
| 15  | N        | 0.555034687 | 0.279515429 | 0.078533017 |
| 16  | N        | 0.402771746 | 0.711914878 | 0.940411022 |
| 17  | N        | 0.900692380 | 0.782336514 | 0.446078310 |
| 18  | N        | 0.049552631 | 0.220614059 | 0.577753925 |
| 19  | N        | 0.563095793 | 0.515213099 | 0.284861659 |
| 20  | N        | 0.398964359 | 0.441216777 | 0.731557583 |
| 21  | N        | 0.897594739 | 0.024359488 | 0.238776590 |
| 22  | N        | 0.055240810 | 0.978120883 | 0.784695981 |
| 23  | N        | 0.486725531 | 0.502918413 | 0.397357433 |
| 24  | N        | 0.463933133 | 0.445104244 | 0.615146988 |
| 25  | N        | 0.970233145 | 0.015103235 | 0.124597651 |
| 26  | N        | 0.982099393 | 0.982078507 | 0.898926437 |
| 27  | N        | 0.828520082 | 0.550325939 | 0.266741656 |
| 28  | N        | 0.134157971 | 0.448275183 | 0.753688941 |
| 29  | N        | 0.631220862 | 0.047662384 | 0.258091151 |
| 30  | N        | 0.322694107 | 0.952782989 | 0.767094355 |
| 31  | N        | 0.954475309 | 0.605382098 | 0.361053238 |
| 32  | N        | 0.002475612 | 0.398670247 | 0.661348219 |
| 33  | N        | 0.503195501 | 0.102661841 | 0.165267334 |
| 34  | N        | 0.449970568 | 0.894613873 | 0.859476257 |
| 35  | N        | 0.141567466 | 0.568881226 | 0.469672887 |
| 36  | N        | 0.815366218 | 0.442078812 | 0.553495787 |
| 37  | N        | 0.319307360 | 0.059435652 | 0.056650448 |
| 38  | N        | 0.632342678 | 0.934343100 | 0.970567112 |
| 39  | N        | 0.318769875 | 0.514840702 | 0.495773441 |

|    |   |             |              |             |
|----|---|-------------|--------------|-------------|
| 40 | N | 0.641011110 | 0.506235606  | 0.530086547 |
| 41 | N | 0.143390425 | -0.001327130 | 0.027481266 |
| 42 | N | 0.809436785 | 0.993232281  | 0.997553008 |
| 43 | N | 0.065332836 | 0.722978535  | 0.562287445 |
| 44 | N | 0.886455672 | 0.281705903  | 0.462017238 |
| 45 | N | 0.388679334 | 0.216328632  | 0.963729619 |
| 46 | N | 0.561878375 | 0.773721787  | 0.060643331 |
| 47 | N | 0.136211627 | 0.835884444  | 0.651223458 |
| 48 | N | 0.819402590 | 0.168681510  | 0.371955447 |
| 49 | N | 0.313408562 | 0.325319647  | 0.873507974 |
| 50 | N | 0.635106019 | 0.662789673  | 0.150446032 |
| 51 | N | 0.476483261 | 0.657459572  | 0.548634372 |
| 52 | O | 0.576557169 | 0.337045681  | 0.142572436 |
| 53 | C | 0.389702430 | 0.653236511  | 0.876335142 |
| 54 | C | 0.883887834 | 0.841637993  | 0.382509895 |
| 55 | C | 0.067905989 | 0.162136652  | 0.641614953 |
| 56 | C | 0.682748209 | 0.403505974  | 0.058829710 |
| 57 | C | 0.275875959 | 0.585561890  | 0.954860841 |
| 58 | C | 0.771662198 | 0.905570482  | 0.463483437 |
| 59 | C | 0.180517758 | 0.098933595  | 0.560595674 |
| 60 | C | 0.621854266 | 0.321460894  | 0.024959100 |
| 61 | C | 0.331072631 | 0.669359881  | 0.990628205 |
| 62 | C | 0.830098867 | 0.822627660  | 0.497876735 |
| 63 | C | 0.120460193 | 0.180836813  | 0.525932300 |
| 64 | C | 0.579823399 | 0.486840397  | 0.359107712 |
| 65 | C | 0.392040285 | 0.487840361  | 0.662195023 |
| 66 | C | 0.879822853 | 0.995163854  | 0.164741547 |
| 67 | C | 0.073602546 | 0.001659080  | 0.859759730 |
| 68 | C | 0.452762046 | 0.552072292  | 0.274992681 |
| 69 | C | 0.480720672 | 0.364403487  | 0.728588029 |
| 70 | C | 0.006197736 | 0.065648940  | 0.246700042 |
| 71 | C | 0.944922466 | 0.940957501  | 0.774948659 |
| 72 | C | 0.405577840 | 0.544443767  | 0.344113819 |
| 73 | C | 0.521392341 | 0.367503642  | 0.656808660 |
| 74 | C | 0.051151780 | 0.059465436  | 0.176657583 |
| 75 | C | 0.899668211 | 0.943877755  | 0.845040733 |
| 76 | C | 0.843737492 | 0.599385106  | 0.335105642 |
| 77 | C | 0.114393364 | 0.402747165  | 0.684411232 |
| 78 | C | 0.614321847 | 0.096806774  | 0.189923638 |
| 79 | C | 0.339225792 | 0.898867311  | 0.833380767 |
| 80 | C | 0.936163039 | 0.524282779  | 0.247503843 |
| 81 | C | 0.028481326 | 0.473992613  | 0.776695457 |
| 82 | C | 0.524331495 | 0.021233024  | 0.278656957 |
| 83 | C | 0.429522677 | 0.983896772  | 0.749288022 |
| 84 | C | 0.013733645 | 0.557979527  | 0.305563511 |
| 85 | C | 0.947246695 | 0.443618146  | 0.719782815 |
| 86 | C | 0.445379818 | 0.054903484  | 0.221417838 |
| 87 | C | 0.507889629 | 0.948381773  | 0.806194331 |

|     |   |             |             |             |
|-----|---|-------------|-------------|-------------|
| 88  | C | 0.248956929 | 0.597831934 | 0.492186604 |
| 89  | C | 0.706547131 | 0.420354821 | 0.529041234 |
| 90  | C | 0.211096500 | 0.083256526 | 0.031712844 |
| 91  | C | 0.741205130 | 0.909029598 | 0.992517104 |
| 92  | C | 0.143757080 | 0.462047343 | 0.458967016 |
| 93  | C | 0.818388749 | 0.547373976 | 0.570793085 |
| 94  | C | 0.320623677 | 0.953024979 | 0.068774064 |
| 95  | C | 0.631138656 | 0.041276453 | 0.961466680 |
| 96  | C | 0.253934510 | 0.428145878 | 0.475291636 |
| 97  | C | 0.710197601 | 0.587283430 | 0.556172747 |
| 98  | C | 0.211890579 | 0.915607727 | 0.050636047 |
| 99  | C | 0.740637910 | 0.077599268 | 0.978383178 |
| 100 | C | 0.086236859 | 0.824047089 | 0.579674441 |
| 101 | C | 0.862252724 | 0.181048607 | 0.445226426 |
| 102 | C | 0.364527581 | 0.316373328 | 0.945035483 |
| 103 | C | 0.586888779 | 0.673418202 | 0.078178308 |
| 104 | C | 0.104175318 | 0.666873816 | 0.626833429 |
| 105 | C | 0.857751982 | 0.336976271 | 0.395272467 |
| 106 | C | 0.351015035 | 0.157886394 | 0.900114171 |
| 107 | C | 0.596042646 | 0.830555189 | 0.125822082 |
| 108 | C | 0.147296141 | 0.736536348 | 0.681738053 |
| 109 | C | 0.816889144 | 0.267184468 | 0.339678410 |
| 110 | C | 0.305028420 | 0.225046468 | 0.844437543 |
| 111 | C | 0.640468367 | 0.762198012 | 0.181216708 |
| 112 | C | 0.413055337 | 0.902036152 | 0.529973250 |
| 113 | H | 0.536694474 | 0.324167635 | 0.195575458 |
| 114 | H | 0.434762283 | 0.666917407 | 0.825539408 |
| 115 | H | 0.927520075 | 0.830353774 | 0.330847637 |
| 116 | H | 0.024744303 | 0.173502541 | 0.693476814 |
| 117 | H | 0.743990119 | 0.455335793 | 0.035442745 |
| 118 | H | 0.213305103 | 0.532571097 | 0.975424765 |
| 119 | H | 0.707669262 | 0.955766030 | 0.485262628 |
| 120 | H | 0.244236816 | 0.048633161 | 0.538686964 |
| 121 | H | 0.620108409 | 0.290978738 | 0.967019889 |
| 122 | H | 0.325937676 | 0.700797382 | 0.047808562 |
| 123 | H | 0.827339172 | 0.790077721 | 0.554915940 |
| 124 | H | 0.122070588 | 0.212741401 | 0.468552323 |
| 125 | H | 0.659020422 | 0.454626180 | 0.384653709 |
| 126 | H | 0.335604276 | 0.552336255 | 0.645918978 |
| 127 | H | 0.801698760 | 0.959356739 | 0.140448657 |
| 128 | H | 0.152990346 | 0.033202427 | 0.885565147 |
| 129 | H | 0.417049593 | 0.581967097 | 0.220083134 |
| 130 | H | 0.501991707 | 0.312436935 | 0.776674308 |
| 131 | H | 0.042359807 | 0.097223772 | 0.300970965 |
| 132 | H | 0.907837966 | 0.914100830 | 0.719496730 |
| 133 | H | 0.321725520 | 0.566341235 | 0.359201275 |
| 134 | H | 0.586237449 | 0.320370690 | 0.633174889 |
| 135 | H | 0.133744552 | 0.083578703 | 0.160239949 |

|     |   |             |             |             |
|-----|---|-------------|-------------|-------------|
| 136 | H | 0.816044259 | 0.921203345 | 0.860384225 |
| 137 | H | 0.775006703 | 0.630040953 | 0.366042863 |
| 138 | H | 0.180757531 | 0.373281513 | 0.650826989 |
| 139 | H | 0.682159306 | 0.127499643 | 0.158107663 |
| 140 | H | 0.271347568 | 0.863636984 | 0.862849435 |
| 141 | H | 0.949524892 | 0.483264051 | 0.194701162 |
| 142 | H | 0.018912384 | 0.512389430 | 0.831100978 |
| 143 | H | 0.512409902 | 0.980127889 | 0.331725766 |
| 144 | H | 0.441711427 | 0.029006531 | 0.698062841 |
| 145 | H | 0.105529134 | 0.550739839 | 0.311739390 |
| 146 | H | 0.855464755 | 0.451489279 | 0.716186459 |
| 147 | H | 0.353581310 | 0.047108968 | 0.216101966 |
| 148 | H | 0.599384684 | 0.958349035 | 0.812977095 |
| 149 | H | 0.276884685 | 0.676234529 | 0.507410161 |
| 150 | H | 0.676429303 | 0.344100060 | 0.509548194 |
| 151 | H | 0.182636945 | 0.161461309 | 0.016018360 |
| 152 | H | 0.769705602 | 0.829992236 | 0.005460014 |
| 153 | H | 0.068126226 | 0.418298689 | 0.439323240 |
| 154 | H | 0.895969584 | 0.585739722 | 0.593449057 |
| 155 | H | 0.396821135 | 0.912231859 | 0.090916570 |
| 156 | H | 0.554413849 | 0.083133348 | 0.941789069 |
| 157 | H | 0.290323647 | 0.350602669 | 0.474325922 |
| 158 | H | 0.675392981 | 0.664874805 | 0.561497183 |
| 159 | H | 0.178904722 | 0.836718839 | 0.052611395 |
| 160 | H | 0.773735407 | 0.156574073 | 0.978321185 |
| 161 | H | 0.064894990 | 0.888404920 | 0.540743758 |
| 162 | H | 0.876883398 | 0.117210988 | 0.485676768 |
| 163 | H | 0.385138566 | 0.382156583 | 0.982770441 |
| 164 | H | 0.569432721 | 0.608617639 | 0.038964734 |
| 165 | H | 0.099124181 | 0.582485157 | 0.628770340 |
| 166 | H | 0.868312942 | 0.420859651 | 0.392359899 |
| 167 | H | 0.359372049 | 0.073699738 | 0.899240083 |
| 168 | H | 0.587003675 | 0.914655696 | 0.127953391 |
| 169 | H | 0.184038685 | 0.722640278 | 0.739868251 |
| 170 | H | 0.787218126 | 0.280438664 | 0.279996903 |
| 171 | H | 0.268462697 | 0.209098473 | 0.786558450 |
| 172 | H | 0.674654576 | 0.777050968 | 0.239805829 |
| 173 | H | 0.464888182 | 0.969150261 | 0.550472216 |
| 174 | H | 0.343851075 | 0.890278670 | 0.567320954 |
| 175 | H | 0.465526463 | 0.831236965 | 0.531820962 |
| 176 | H | 0.377611801 | 0.916525631 | 0.470836045 |

### S3.7. IM

Energy (eV): -1148.57

Simulation cell vectos (Å):

a = 11.7950000762999991 0.0000000000000000 0.0000000000000000  
b = -0.0156551823000000 12.8139905664999993 0.0000000000000000  
c = -1.4527354561000001 0.0073720601000000 17.4094911285999991

Fractional coordinates:

| No. | Element | X            | Y           | Z           |
|-----|---------|--------------|-------------|-------------|
| 1   | Zn      | 0.668722439  | 0.529984027 | 0.211591647 |
| 2   | Zn      | 0.287895788  | 0.453913798 | 0.812384862 |
| 3   | Zn      | 0.783452969  | 0.045103981 | 0.318921061 |
| 4   | Zn      | 0.171126681  | 0.967903393 | 0.710119994 |
| 5   | Cu      | 0.015731828  | 0.676793925 | 0.454434095 |
| 6   | Cu      | 0.933981316  | 0.341494234 | 0.570973041 |
| 7   | Cu      | 0.449524196  | 0.160983135 | 0.064175486 |
| 8   | Cu      | 0.511474757  | 0.828467993 | 0.959336248 |
| 9   | Cu      | 0.481701466  | 0.529549421 | 0.520338167 |
| 10  | Cu      | 0.978709955  | 0.997879955 | 0.015955052 |
| 11  | N       | 0.651679395  | 0.414308448 | 0.133896943 |
| 12  | N       | 0.318097870  | 0.572840047 | 0.883806028 |
| 13  | N       | 0.806828716  | 0.925502165 | 0.390943334 |
| 14  | N       | 0.142331662  | 0.088822564 | 0.638752658 |
| 15  | N       | 0.559545843  | 0.278314001 | 0.077141489 |
| 16  | N       | 0.405496334  | 0.709888662 | 0.941889396 |
| 17  | N       | 0.902320546  | 0.789312124 | 0.443698161 |
| 18  | N       | 0.043472265  | 0.222689926 | 0.584590549 |
| 19  | N       | 0.558018313  | 0.493617410 | 0.287242178 |
| 20  | N       | 0.393928145  | 0.439730293 | 0.728280701 |
| 21  | N       | 0.899432006  | 0.035736763 | 0.241672900 |
| 22  | N       | 0.056915044  | 0.974220904 | 0.788566519 |
| 23  | N       | 0.490815505  | 0.443833701 | 0.398997953 |
| 24  | N       | 0.459062399  | 0.453710777 | 0.612754717 |
| 25  | N       | 0.972870028  | 0.021373722 | 0.128018635 |
| 26  | N       | 0.984453741  | 0.980698856 | 0.902980308 |
| 27  | N       | 0.821798909  | 0.551682896 | 0.268328863 |
| 28  | N       | 0.132238811  | 0.450324537 | 0.758633430 |
| 29  | N       | 0.632882349  | 0.053682403 | 0.259531943 |
| 30  | N       | 0.323243203  | 0.949604284 | 0.768076024 |
| 31  | N       | 0.952144479  | 0.610669074 | 0.358546257 |
| 32  | N       | -0.003032052 | 0.399967951 | 0.669061361 |
| 33  | N       | 0.506104645  | 0.102574400 | 0.164102687 |
| 34  | N       | 0.451684138  | 0.891485000 | 0.859927273 |
| 35  | N       | 0.148984505  | 0.582737975 | 0.460028793 |
| 36  | N       | 0.812689667  | 0.450787520 | 0.561553079 |
| 37  | N       | 0.323380454  | 0.058541427 | 0.055492079 |
| 38  | N       | 0.636016525  | 0.931047211 | 0.970812291 |
| 39  | N       | 0.323079699  | 0.531695059 | 0.498956196 |
| 40  | N       | 0.640499749  | 0.519560034 | 0.540309465 |



|    |   |             |              |             |
|----|---|-------------|--------------|-------------|
| 41 | N | 0.145814311 | 0.999766088  | 0.030852329 |
| 42 | N | 0.811403719 | 0.992184483  | 0.001344797 |
| 43 | N | 0.069806888 | 0.727667200  | 0.557539150 |
| 44 | N | 0.881907879 | 0.288498586  | 0.469028413 |
| 45 | N | 0.394251311 | 0.213668264  | 0.961571190 |
| 46 | N | 0.562564769 | 0.773621718  | 0.062843188 |
| 47 | N | 0.136727237 | 0.836753662  | 0.650339080 |
| 48 | N | 0.819839458 | 0.177714641  | 0.376133332 |
| 49 | N | 0.317400925 | 0.322959874  | 0.872172734 |
| 50 | N | 0.628322531 | 0.662954284  | 0.155189554 |
| 51 | O | 0.495744512 | 0.658237707  | 0.474014845 |
| 52 | C | 0.577953042 | 0.335299387  | 0.141762217 |
| 53 | C | 0.393187923 | 0.651152169  | 0.877854711 |
| 54 | C | 0.884873968 | 0.850989305  | 0.381447550 |
| 55 | C | 0.062715413 | 0.162421100  | 0.647539261 |
| 56 | C | 0.682729652 | 0.407012438  | 0.059464754 |
| 57 | C | 0.279718180 | 0.582593303  | 0.956198168 |
| 58 | C | 0.771790658 | 0.910113905  | 0.463690023 |
| 59 | C | 0.176472714 | 0.103479250  | 0.565639157 |
| 60 | C | 0.625655789 | 0.323539592  | 0.024464965 |
| 61 | C | 0.334004550 | 0.666798045  | 0.991990996 |
| 62 | C | 0.831168596 | 0.826479137  | 0.496296930 |
| 63 | C | 0.115289315 | 0.185653536  | 0.532232282 |
| 64 | C | 0.582719499 | 0.469322754  | 0.362242935 |
| 65 | C | 0.390966341 | 0.495443250  | 0.663011272 |
| 66 | C | 0.882525798 | 0.002682598  | 0.168498021 |
| 67 | C | 0.075775155 | -0.000859242 | 0.863359438 |
| 68 | C | 0.441344657 | 0.482097148  | 0.274808622 |
| 69 | C | 0.467880695 | 0.357853602  | 0.718987251 |
| 70 | C | 0.007501713 | 0.078289884  | 0.248712090 |
| 71 | C | 0.946482030 | 0.937322328  | 0.779481899 |
| 72 | C | 0.400857241 | 0.451459838  | 0.343272713 |
| 73 | C | 0.508660718 | 0.366678142  | 0.647631179 |
| 74 | C | 0.053002011 | 0.068930528  | 0.179011715 |
| 75 | C | 0.901665702 | 0.941815854  | 0.849673036 |
| 76 | C | 0.840584052 | 0.605893864  | 0.334220557 |
| 77 | C | 0.109452935 | 0.404795532  | 0.689689515 |
| 78 | C | 0.616792461 | 0.099392593  | 0.190096784 |
| 79 | C | 0.340544724 | 0.896745510  | 0.834820092 |
| 80 | C | 0.927885881 | 0.520713096  | 0.248947604 |
| 81 | C | 0.027823256 | 0.475330329  | 0.784098044 |
| 82 | C | 0.525875108 | 0.026593087  | 0.279536742 |
| 83 | C | 0.430001978 | 0.978874017  | 0.748920333 |
| 84 | C | 0.008180464 | 0.556752444  | 0.304515041 |
| 85 | C | 0.944356530 | 0.444455356  | 0.728832191 |
| 86 | C | 0.447659422 | 0.056542776  | 0.220668636 |

|     |   |             |             |             |
|-----|---|-------------|-------------|-------------|
| 87  | C | 0.509074000 | 0.943290865 | 0.805437304 |
| 88  | C | 0.257139528 | 0.613469148 | 0.476973684 |
| 89  | C | 0.703715972 | 0.432622338 | 0.535797798 |
| 90  | C | 0.214710075 | 0.083516978 | 0.032838273 |
| 91  | C | 0.744298946 | 0.907209428 | 0.995665677 |
| 92  | C | 0.146672178 | 0.475952973 | 0.471455491 |
| 93  | C | 0.818238513 | 0.554681522 | 0.583421173 |
| 94  | C | 0.323788142 | 0.952337077 | 0.068555720 |
| 95  | C | 0.633999543 | 0.037776621 | 0.960539044 |
| 96  | C | 0.254821396 | 0.443819888 | 0.496265034 |
| 97  | C | 0.711318738 | 0.597493212 | 0.570113628 |
| 98  | C | 0.214038522 | 0.916066285 | 0.053086764 |
| 99  | C | 0.742341944 | 0.075480715 | 0.979590045 |
| 100 | C | 0.087195147 | 0.827981862 | 0.578394972 |
| 101 | C | 0.856503564 | 0.188471071 | 0.450725322 |
| 102 | C | 0.370807552 | 0.313800385 | 0.943031105 |
| 103 | C | 0.582657994 | 0.673036515 | 0.082326083 |
| 104 | C | 0.110969871 | 0.668541645 | 0.619974854 |
| 105 | C | 0.860702132 | 0.344906006 | 0.401914830 |
| 106 | C | 0.353755836 | 0.155318094 | 0.898601774 |
| 107 | C | 0.597645499 | 0.831317841 | 0.127464692 |
| 108 | C | 0.151440408 | 0.735877015 | 0.677358900 |
| 109 | C | 0.822842330 | 0.276471176 | 0.344620696 |
| 110 | C | 0.306737866 | 0.222629975 | 0.843375154 |
| 111 | C | 0.637624329 | 0.763121830 | 0.184325097 |
| 112 | C | 0.438049682 | 0.914755175 | 0.497600052 |
| 113 | H | 0.537668177 | 0.320131469 | 0.194273691 |
| 114 | H | 0.438314729 | 0.665375632 | 0.827178083 |
| 115 | H | 0.928661364 | 0.842341680 | 0.329585672 |
| 116 | H | 0.019366753 | 0.171523854 | 0.699556152 |
| 117 | H | 0.742392288 | 0.461316531 | 0.037030457 |
| 118 | H | 0.217465035 | 0.529215460 | 0.976679632 |
| 119 | H | 0.706521698 | 0.958137143 | 0.486200255 |
| 120 | H | 0.240605274 | 0.054323460 | 0.542847263 |
| 121 | H | 0.626184178 | 0.294124871 | 0.966333317 |
| 122 | H | 0.328311438 | 0.698155433 | 0.049130141 |
| 123 | H | 0.828841035 | 0.791372804 | 0.552516317 |
| 124 | H | 0.116535896 | 0.219300080 | 0.475331727 |
| 125 | H | 0.669002175 | 0.469754691 | 0.389024787 |
| 126 | H | 0.338787760 | 0.564255613 | 0.651297783 |
| 127 | H | 0.805018104 | 0.965028254 | 0.144980758 |
| 128 | H | 0.155313569 | 0.031054933 | 0.888619128 |
| 129 | H | 0.396730412 | 0.497010201 | 0.218986513 |
| 130 | H | 0.484751326 | 0.299050561 | 0.763132320 |
| 131 | H | 0.042939292 | 0.112900718 | 0.302131369 |
| 132 | H | 0.908967697 | 0.909736082 | 0.724340901 |

|     |   |             |             |             |
|-----|---|-------------|-------------|-------------|
| 133 | H | 0.313967391 | 0.435685746 | 0.356042680 |
| 134 | H | 0.568402415 | 0.318405540 | 0.619922839 |
| 135 | H | 0.135370033 | 0.092944873 | 0.162112330 |
| 136 | H | 0.818033271 | 0.919837863 | 0.865411615 |
| 137 | H | 0.774051993 | 0.641436021 | 0.364691023 |
| 138 | H | 0.174174802 | 0.375616203 | 0.654644249 |
| 139 | H | 0.684856564 | 0.129973019 | 0.158479408 |
| 140 | H | 0.272874635 | 0.863021916 | 0.865323042 |
| 141 | H | 0.938242732 | 0.474867799 | 0.197807955 |
| 142 | H | 0.020635992 | 0.513441852 | 0.838904996 |
| 143 | H | 0.513536564 | 0.987996029 | 0.333530689 |
| 144 | H | 0.441713152 | 0.023239220 | 0.697250590 |
| 145 | H | 0.099829211 | 0.547850885 | 0.309994250 |
| 146 | H | 0.852639618 | 0.451754030 | 0.727183973 |
| 147 | H | 0.356009338 | 0.047454403 | 0.214594997 |
| 148 | H | 0.600747510 | 0.952316818 | 0.811342801 |
| 149 | H | 0.288910130 | 0.692548743 | 0.473864919 |
| 150 | H | 0.671507362 | 0.359468250 | 0.511618790 |
| 151 | H | 0.186719003 | 0.161862582 | 0.017139446 |
| 152 | H | 0.773103647 | 0.828742734 | 0.010204837 |
| 153 | H | 0.069427842 | 0.430738131 | 0.459450433 |
| 154 | H | 0.896908504 | 0.590177966 | 0.607144855 |
| 155 | H | 0.400184849 | 0.911037844 | 0.089642026 |
| 156 | H | 0.557555862 | 0.078617883 | 0.938935787 |
| 157 | H | 0.288351038 | 0.367072096 | 0.510932766 |
| 158 | H | 0.679744335 | 0.675902809 | 0.577143678 |
| 159 | H | 0.180055645 | 0.837683730 | 0.056404169 |
| 160 | H | 0.774441311 | 0.154801096 | 0.979461548 |
| 161 | H | 0.063668213 | 0.894083090 | 0.541629796 |
| 162 | H | 0.866167018 | 0.123972504 | 0.491013931 |
| 163 | H | 0.393340823 | 0.379519552 | 0.980404920 |
| 164 | H | 0.563737028 | 0.607608840 | 0.043953022 |
| 165 | H | 0.108713173 | 0.583930966 | 0.619028781 |
| 166 | H | 0.873586766 | 0.428574129 | 0.399923847 |
| 167 | H | 0.360912625 | 0.071062591 | 0.897885331 |
| 168 | H | 0.591987983 | 0.915738503 | 0.128312294 |
| 169 | H | 0.188080896 | 0.719429920 | 0.735158725 |
| 170 | H | 0.798044748 | 0.290985307 | 0.284369043 |
| 171 | H | 0.267442981 | 0.206720654 | 0.786168836 |
| 172 | H | 0.671336872 | 0.778829417 | 0.242886754 |
| 173 | H | 0.461130874 | 0.953474558 | 0.552105461 |
| 174 | H | 0.459240241 | 0.832759805 | 0.490036671 |
| 175 | H | 0.526086272 | 0.643708511 | 0.424790379 |
| 176 | H | 0.393577837 | 0.958733565 | 0.451021266 |

### S3.8. TS

Energy (eV): -1148.41

Simulation cell vectos (Å):

|     |                     |                     |                     |
|-----|---------------------|---------------------|---------------------|
| a = | 11.7950000762999991 | 0.0000000000000000  | 0.0000000000000000  |
| b = | -0.0156551823000000 | 12.8139905664999993 | 0.0000000000000000  |
| c = | -1.4527354561000001 | 0.0073720601000000  | 17.4094911285999991 |

Fractional coordinates:

| No. | Element | X           | Y           | Z           |
|-----|---------|-------------|-------------|-------------|
| 1   | Zn      | 0.670256205 | 0.529968835 | 0.210559255 |
| 2   | Zn      | 0.285415500 | 0.456847518 | 0.814254569 |
| 3   | Zn      | 0.783717805 | 0.041022292 | 0.318002988 |
| 4   | Zn      | 0.171984822 | 0.965141324 | 0.709656486 |
| 5   | Cu      | 0.014036855 | 0.671579634 | 0.455927999 |
| 6   | Cu      | 0.938192357 | 0.337913852 | 0.569300025 |
| 7   | Cu      | 0.449022771 | 0.160948096 | 0.064038940 |
| 8   | Cu      | 0.510346192 | 0.829694233 | 0.960445817 |
| 9   | Cu      | 0.480364470 | 0.518889343 | 0.515811914 |
| 10  | Cu      | 0.978599649 | 0.997231584 | 0.014692291 |
| 11  | N       | 0.651230974 | 0.414186796 | 0.133706742 |
| 12  | N       | 0.313751003 | 0.575164686 | 0.886581856 |
| 13  | N       | 0.807530369 | 0.922003205 | 0.390513073 |
| 14  | N       | 0.144786203 | 0.085212097 | 0.637665313 |
| 15  | N       | 0.559060094 | 0.278112040 | 0.077232324 |
| 16  | N       | 0.403247040 | 0.711604904 | 0.944046814 |
| 17  | N       | 0.901974209 | 0.785671294 | 0.444053878 |
| 18  | N       | 0.047573074 | 0.219591864 | 0.582979534 |
| 19  | N       | 0.558145539 | 0.499514126 | 0.286798455 |
| 20  | N       | 0.395044822 | 0.448981259 | 0.732727472 |
| 21  | N       | 0.899468748 | 0.032664431 | 0.240654183 |
| 22  | N       | 0.057242321 | 0.971516073 | 0.787697161 |
| 23  | N       | 0.487638194 | 0.464750393 | 0.399460328 |
| 24  | N       | 0.462224893 | 0.460209774 | 0.617307168 |
| 25  | N       | 0.972525108 | 0.020096343 | 0.126786195 |
| 26  | N       | 0.984647333 | 0.978673540 | 0.902013492 |
| 27  | N       | 0.822673246 | 0.549772792 | 0.267673576 |
| 28  | N       | 0.131362016 | 0.449613850 | 0.758809426 |
| 29  | N       | 0.632887959 | 0.051388695 | 0.258842795 |
| 30  | N       | 0.323563837 | 0.948364216 | 0.768219026 |
| 31  | N       | 0.952375371 | 0.607442446 | 0.358728338 |
| 32  | N       | 0.999106574 | 0.396760653 | 0.668073670 |
| 33  | N       | 0.506088845 | 0.102100957 | 0.163931692 |

|    |   |             |             |             |
|----|---|-------------|-------------|-------------|
| 34 | N | 0.451376576 | 0.891768358 | 0.860897510 |
| 35 | N | 0.143883840 | 0.574124595 | 0.463349874 |
| 36 | N | 0.815927515 | 0.444975464 | 0.559506408 |
| 37 | N | 0.323159374 | 0.058407293 | 0.055000990 |
| 38 | N | 0.635088336 | 0.932377392 | 0.971535363 |
| 39 | N | 0.318677044 | 0.519684723 | 0.498647158 |
| 40 | N | 0.641861140 | 0.510603800 | 0.536126452 |
| 41 | N | 0.145747430 | 0.999471341 | 0.029856445 |
| 42 | N | 0.811295390 | 0.992555963 | 0.000004209 |
| 43 | N | 0.068516581 | 0.723996861 | 0.558570948 |
| 44 | N | 0.885318861 | 0.284325330 | 0.467148618 |
| 45 | N | 0.393406859 | 0.214822453 | 0.961860777 |
| 46 | N | 0.562613822 | 0.774464824 | 0.063429930 |
| 47 | N | 0.137480389 | 0.833788555 | 0.650276895 |
| 48 | N | 0.819448644 | 0.173429899 | 0.375411065 |
| 49 | N | 0.316492857 | 0.325071911 | 0.873128099 |
| 50 | N | 0.630158231 | 0.663152164 | 0.154708507 |
| 51 | O | 0.488803815 | 0.667939924 | 0.493400275 |
| 52 | C | 0.577608735 | 0.335163381 | 0.141788983 |
| 53 | C | 0.389095451 | 0.653099391 | 0.879984406 |
| 54 | C | 0.884744719 | 0.846612033 | 0.381387369 |
| 55 | C | 0.066807325 | 0.160230084 | 0.646362742 |
| 56 | C | 0.681997992 | 0.406847648 | 0.059213806 |
| 57 | C | 0.277196218 | 0.584845715 | 0.959450896 |
| 58 | C | 0.772994218 | 0.908090783 | 0.463546341 |
| 59 | C | 0.177752751 | 0.097853560 | 0.564101153 |
| 60 | C | 0.624873684 | 0.323301485 | 0.024392816 |
| 61 | C | 0.332777475 | 0.668660526 | 0.994881978 |
| 62 | C | 0.831625587 | 0.824319132 | 0.496587989 |
| 63 | C | 0.117521019 | 0.180322543 | 0.530367854 |
| 64 | C | 0.581578839 | 0.480466680 | 0.362349003 |
| 65 | C | 0.388051138 | 0.496903872 | 0.664589674 |
| 66 | C | 0.882708005 | 0.999920954 | 0.167394192 |
| 67 | C | 0.075591057 | 0.997923661 | 0.862223345 |
| 68 | C | 0.441367084 | 0.494896168 | 0.274171422 |
| 69 | C | 0.479186021 | 0.377205520 | 0.729012392 |
| 70 | C | 0.006819479 | 0.076693476 | 0.247574175 |
| 71 | C | 0.947617304 | 0.932699528 | 0.778992914 |
| 72 | C | 0.398831967 | 0.473284772 | 0.343120851 |
| 73 | C | 0.521491556 | 0.384318497 | 0.658088032 |
| 74 | C | 0.052103528 | 0.068411701 | 0.177736499 |
| 75 | C | 0.902683235 | 0.937630896 | 0.849127964 |
| 76 | C | 0.841131222 | 0.603683369 | 0.333722430 |
| 77 | C | 0.111054743 | 0.402712536 | 0.690152324 |
| 78 | C | 0.616860653 | 0.097824749 | 0.189644162 |
| 79 | C | 0.340377288 | 0.896768893 | 0.835481736 |

|     |   |             |             |             |
|-----|---|-------------|-------------|-------------|
| 80  | C | 0.928708959 | 0.517904190 | 0.248897001 |
| 81  | C | 0.025851401 | 0.474344232 | 0.782495678 |
| 82  | C | 0.525736779 | 0.025096260 | 0.278979187 |
| 83  | C | 0.430480332 | 0.977141797 | 0.749075457 |
| 84  | C | 0.008594076 | 0.553157559 | 0.304999560 |
| 85  | C | 0.944253757 | 0.441949011 | 0.726523567 |
| 86  | C | 0.447523090 | 0.056154632 | 0.220454844 |
| 87  | C | 0.509198927 | 0.942496833 | 0.806121559 |
| 88  | C | 0.252541589 | 0.602594578 | 0.481624309 |
| 89  | C | 0.707277775 | 0.424519052 | 0.534047027 |
| 90  | C | 0.214659834 | 0.083183448 | 0.031649909 |
| 91  | C | 0.743517052 | 0.908041841 | 0.995545602 |
| 92  | C | 0.140817951 | 0.467049031 | 0.469344400 |
| 93  | C | 0.819286116 | 0.549471693 | 0.579227576 |
| 94  | C | 0.323381358 | 0.952352118 | 0.068707011 |
| 95  | C | 0.633708006 | 0.038968163 | 0.960452577 |
| 96  | C | 0.249053948 | 0.432947821 | 0.492126364 |
| 97  | C | 0.711401728 | 0.589898998 | 0.565002674 |
| 98  | C | 0.213737915 | 0.915995264 | 0.052931207 |
| 99  | C | 0.742570602 | 0.076094258 | 0.978274433 |
| 100 | C | 0.088099208 | 0.824360545 | 0.578321013 |
| 101 | C | 0.860342377 | 0.184163752 | 0.449117107 |
| 102 | C | 0.368905376 | 0.315048254 | 0.944182829 |
| 103 | C | 0.583588302 | 0.673812508 | 0.082126563 |
| 104 | C | 0.107849486 | 0.665605744 | 0.621784389 |
| 105 | C | 0.859173209 | 0.340887120 | 0.400796134 |
| 106 | C | 0.354584620 | 0.157347512 | 0.898079676 |
| 107 | C | 0.597938344 | 0.831584898 | 0.128237898 |
| 108 | C | 0.149645275 | 0.733354087 | 0.678466728 |
| 109 | C | 0.819027137 | 0.272433510 | 0.344194246 |
| 110 | C | 0.307608219 | 0.225291717 | 0.843266414 |
| 111 | C | 0.639016405 | 0.762971708 | 0.184497192 |
| 112 | C | 0.425346813 | 0.902795824 | 0.497024228 |
| 113 | H | 0.537623434 | 0.319939056 | 0.194413408 |
| 114 | H | 0.433182003 | 0.666981548 | 0.828819535 |
| 115 | H | 0.928072956 | 0.836781489 | 0.329450393 |
| 116 | H | 0.024483903 | 0.170980228 | 0.698603955 |
| 117 | H | 0.741492529 | 0.461176880 | 0.036629657 |
| 118 | H | 0.215156321 | 0.531716612 | 0.980485551 |
| 119 | H | 0.709276279 | 0.957734582 | 0.486158211 |
| 120 | H | 0.240582653 | 0.047342868 | 0.541284553 |
| 121 | H | 0.625142161 | 0.293791174 | 0.966274968 |
| 122 | H | 0.328607305 | 0.699823694 | 0.052206546 |
| 123 | H | 0.829229619 | 0.790068384 | 0.553099235 |
| 124 | H | 0.118271953 | 0.212835165 | 0.473113611 |
| 125 | H | 0.667168571 | 0.477487332 | 0.389790112 |

|     |   |             |             |             |
|-----|---|-------------|-------------|-------------|
| 126 | H | 0.328390773 | 0.557223875 | 0.648769164 |
| 127 | H | 0.805663091 | 0.961448064 | 0.143941402 |
| 128 | H | 0.154495427 | 0.031441725 | 0.887150885 |
| 129 | H | 0.397965225 | 0.507794215 | 0.217750546 |
| 130 | H | 0.501358472 | 0.325815903 | 0.776384038 |
| 131 | H | 0.041878070 | 0.111510084 | 0.301011143 |
| 132 | H | 0.910754345 | 0.903573092 | 0.724156929 |
| 133 | H | 0.311514294 | 0.463799269 | 0.356073618 |
| 134 | H | 0.588094910 | 0.341830990 | 0.633992614 |
| 135 | H | 0.133981009 | 0.093600471 | 0.160701570 |
| 136 | H | 0.819532796 | 0.914587794 | 0.865133568 |
| 137 | H | 0.774567106 | 0.639804343 | 0.363791613 |
| 138 | H | 0.177158077 | 0.373589418 | 0.656261740 |
| 139 | H | 0.685064285 | 0.127963006 | 0.157942182 |
| 140 | H | 0.272499806 | 0.863682432 | 0.866100894 |
| 141 | H | 0.939284873 | 0.471984443 | 0.197831434 |
| 142 | H | 0.016664135 | 0.513409714 | 0.836657559 |
| 143 | H | 0.513199505 | 0.986185630 | 0.332815834 |
| 144 | H | 0.442540605 | 0.020653385 | 0.697086212 |
| 145 | H | 0.100051796 | 0.543146881 | 0.311084976 |
| 146 | H | 0.852443190 | 0.448803316 | 0.723517907 |
| 147 | H | 0.355788914 | 0.047792836 | 0.214542220 |
| 148 | H | 0.600870479 | 0.951469575 | 0.812191497 |
| 149 | H | 0.284273367 | 0.681627762 | 0.482802698 |
| 150 | H | 0.676929638 | 0.349778229 | 0.511873551 |
| 151 | H | 0.186872966 | 0.161355937 | 0.015323568 |
| 152 | H | 0.771967307 | 0.829549536 | 0.010355389 |
| 153 | H | 0.063367434 | 0.423194226 | 0.455185764 |
| 154 | H | 0.896977484 | 0.586876147 | 0.602614004 |
| 155 | H | 0.399606487 | 0.911217858 | 0.090331445 |
| 156 | H | 0.557299679 | 0.080036859 | 0.939065590 |
| 157 | H | 0.281620577 | 0.355146523 | 0.503113986 |
| 158 | H | 0.678340326 | 0.667978332 | 0.570965240 |
| 159 | H | 0.179708241 | 0.837659836 | 0.056465250 |
| 160 | H | 0.775315254 | 0.155118849 | 0.977252754 |
| 161 | H | 0.066025512 | 0.890065093 | 0.540856171 |
| 162 | H | 0.873172650 | 0.119550899 | 0.488963123 |
| 163 | H | 0.390062378 | 0.380242919 | 0.982324548 |
| 164 | H | 0.564562150 | 0.608765795 | 0.043415500 |
| 165 | H | 0.103583618 | 0.581125559 | 0.621780220 |
| 166 | H | 0.870504862 | 0.424720832 | 0.398810026 |
| 167 | H | 0.362731163 | 0.073208402 | 0.896541511 |
| 168 | H | 0.591734128 | 0.915930469 | 0.129575594 |
| 169 | H | 0.185706054 | 0.717482561 | 0.736482638 |
| 170 | H | 0.790678334 | 0.286983866 | 0.284561765 |
| 171 | H | 0.269623049 | 0.210132812 | 0.785630640 |

|     |   |             |             |             |
|-----|---|-------------|-------------|-------------|
| 172 | H | 0.673308345 | 0.778126442 | 0.243014418 |
| 173 | H | 0.484633696 | 0.963908028 | 0.517214195 |
| 174 | H | 0.429367460 | 0.825775854 | 0.523508609 |
| 175 | H | 0.517652265 | 0.674790865 | 0.442904736 |
| 176 | H | 0.368341000 | 0.916809982 | 0.445799927 |

## References

- 1 M. Cococcioni and S. de Gironcoli, *Phys. Rev. B*, 2005, **71**.
- 2 N. T. Nguyen, T. N. Lo, J. Kim, H. T. Nguyen, T. B. Le, K. E. Cordova and H. Furukawa, *Inorg. Chem.*, 2016, **55**, 6201-6207.
